# Supplementary material for: Long non-coding RNA GRASLND enhances chondrogenesis via suppression of the interferon type II signaling pathway
Source: eLife. 2020 Mar 23;9:e49558. doi: 10.7554/eLife.49558 (PMC7202894; doi:10.7554/eLife.49558)
Supplement: Figure 1—source data 1. [file elife-49558-fig1-data1.xlsx]

## Sheet: Sheet1
Figure 1 Source Data 1: shRNA target sequences. 5’ – sequence – 3’
Gene name	shRNA sequence
LOXL1-AS1	CAGAAGAGGTGCTCGATAAAT
	TGGGTACTTTATTTGCTATTA
MIR4435-1HG	ACAAGATGGTTAAACTCATTT
	CTATTCAGCAGACAATGATAA
RP11-366L20.2	GGTGATGTATGGCCCATAAAT
GRASLND	TACAAAGGTGGCAAGATAAAT
	GGCAAGATAAATGACAATAAA
