# Supplementary material for: Long non-coding RNA GRASLND enhances chondrogenesis via suppression of the interferon type II signaling pathway
Source: eLife. 2020 Mar 23;9:e49558. doi: 10.7554/eLife.49558 (PMC7202894; doi:10.7554/eLife.49558)
Supplement: Figure 1—source data 2. [file elife-49558-fig1-data2.xlsx]

## Sheet: Sheet1
Figure 1 - source data 2: qRT-PCR sequencing primers 5’ – sequence – 3’
Primer name	Primer sequence
r18S forward primer (endogenous control)	CGGCTACCACATCCAAGGAA
r18S reverse primer (endogenous control)	GGGCCTCGAAAGAGTCCTGT
GRASLND forward primer	AGGATTCAGGGGATGCACAG
GRASLND reverse primer	TGGGCTGAAGATGAGACGTT
COL2A1 forward primer	GGCAATAGCAGGTTCACGTA
COL2A1 reverse primer	CTCGATAACAGTCTTGCCCC
ACAN forward primer	CACTTCTGAGTTCGTGGAGG
ACAN reverse primer	ACTGGACTCAAAAAGCTGGG
CASP3 forward primer	AGCGGATGGGTGCTATTGTG
CASP3 reverse primer	TCCAGAGTCCATTGATTCGCTT
TP53 forward primer	ACCTATGGAAACTACTTCCTGAAAA
TP53 reverse primer	CCGGGGACAGCATCAAATCA
PPARG forward primer	AACGAGAGTCAGCCTTTAACGA
PPARG reverse primer	ATCCACGGAGCTGATCCCAA
ADIPOQ forward primer	GAGATCCAGGTCTTATTGGTCC
ADIPOQ reverse primer	ACACTGAATGCTGAGCGGTA
COL1A1 forward primer	TGTTCAGCTTTGTGGACCTC
COL1A1 reverse primer	TTCTGTACGCAGGTGATTGG
COL10A1 forward primer	CATAAAAGGCCCACTACCCAAC
COL10A1 reverse primer	ACCTTGCTCTCCTCTTACTGC
SOX9 forward primer	ACCACCAGAACTCCAGCTC
SOX9 reverse primer	CACTGTGCTGGATATCAGACC
NEAT1 forward primer	ACAGCATTCCTGTCTGCGAA
NEAT1 reverse primer	GACTTCAGGCTCCAGCCATT
GAPDH forward primer	TCACCAGGGCTGCTTTTAAC
GAPDH reverse primer	TGAAGACGCCAGTGGAC
RNF144A forward primer	CTGCTGACTCTGACATGCCC
RNF144A reverse primer	CTGGTGTCCTGCTGTGCTTA
LOXL1-AS1 forward primer	ACCAAAGCCAGGATCAGAGC
LOXL1-AS1 reverse primer	GAGGGTATCTTGCGGAGTGG
RP11-366L20.2 forward primer	TCTTGGGCCAACATGACACC
PR11-366L20.2 reverse primer	ACCTTCCTGGTTGGCTTTGT
MIR4435-1HG forward primer	TCCACAGCACATTTTTATTCAAGTC
MIR4435-1HG reverse primer	CTTCCTTGAGAATCTTGCTCCAAA
