# Supplementary material for: Long non-coding RNA GRASLND enhances chondrogenesis via suppression of the interferon type II signaling pathway
Source: eLife. 2020 Mar 23;9:e49558. doi: 10.7554/eLife.49558 (PMC7202894; doi:10.7554/eLife.49558)
Supplement: Figure 2—source data 1. [file elife-49558-fig2-data1.xlsx]

## Sheet: Sheet1
Figure 2 - source data 1: Cloning primer sequences. 5’ – sequence – 3’
BGHpA forward primer	TATCGATCACGAGACTAGCCTCGAGTCCATAGAGCCCACCGCAT
BGHpA reverse primer	CGCCGTGTAAACGCGTCGACTGTGCCTTCTAGTTG
Luciferase forward primer	GGCACAGTCGACGCGTTTACACGGCGATCTTGCC
Luciferase reverse primer	GCCCCGAATGCTAGCATGGAAGATGCCAAAAACATTAAG
CMV promoter forward primer	CATCTTCCATGCTAGCATTCGGGGCCGCGGAGGC
CMV promoter reverse primer	CAACCCCGTGCGAATTCGATATCAATTTTATCGATCACGAGACTAGCCTCGAGTTTACCAC
dsRed forward primer	CAACTAGAAGGCACAGTCGACGCGTTTACAATTCGTCGTGCTTG
dsRed reverse primer	AGCCTCCGCGGCCCCGAATGCTAGCATGGATAGCACTGAGAAC
RNF144A-AS1 forward primer	CAACTAGAAGGCACAGTCGACGCGTCTTTCATTCAACAAATTTTTATGAAGTGCC
RNF144A-AS1 reverse primer	AGCCTCCGCGGCCCCGAATGCTAGCACGCCATTCTCCTGCCTC
