# Supplementary material for: Long non-coding RNA GRASLND enhances chondrogenesis via suppression of the interferon type II signaling pathway
Source: eLife. 2020 Mar 23;9:e49558. doi: 10.7554/eLife.49558 (PMC7202894; doi:10.7554/eLife.49558)
Supplement: Figure 2—source data 2. [file elife-49558-fig2-data2.xlsx]

## Sheet: Sheet1
Figure 2 - source data 2: GRASLND probe set sequences. 5’ – sequence – 3’
Probe name	Probe sequence
Probe #1	GTTCGTGGTCTTTTTTCTAG
Probe #2	TAGGCAGGTCTCAGGATGTC
Probe #3	CTTCTGGAGGCCACCTAATG
Probe #4	CGGTGTAGGAATCAGGGGAG
Probe #5	GGTGAACAGACAGACTTTCC
Probe #6	AGATGTCCATTCCACCTTTT
Probe #7	TTCATCCTCTAGTGAGAGGC
Probe #8	CAGGCCTTTATGCAGAACGA
Probe #9	GTACTCAACCAGGAACTTCT
Probe #10	CCCTGAATCCTTCATTCATA
Probe #11	AACCATAATATCCCCCAGAT
Probe #12	AGACGTTACATTCCACATTC
Probe #13	TAGCACAGATGGGCTGAAGA
Probe #14	TGGCTTCTGGAATGAGATGA
Probe #15	TGTCTGCTCCTGAGAGAAGG
Probe #16	CTCTGGCAGGAAAGTCTTGT
Probe #17	TGTCTTATGTGGATGCTACT
Probe #18	GCTTGAAGACATCTCTGCAT
Probe #19	GCACTTTCTTTCTTGAAGTT
Probe #20	CAGTGCTGTGTTAAGTGACT
Probe #21	ATGAGTAGTCACCTTCCATG
Probe #22	CCTTGTTCTCTAAGTTGCAG
