# Supplementary material for: Long non-coding RNA GRASLND enhances chondrogenesis via suppression of the interferon type II signaling pathway
Source: eLife. 2020 Mar 23;9:e49558. doi: 10.7554/eLife.49558 (PMC7202894; doi:10.7554/eLife.49558)
Supplement: Supplementary file 2. — Data is expressed as log2FoldChange in KD compared to scrambled control (a positive log2FC means that the gene is upregulated in KD samples. A negative log2FC means that the gene is downregulated in KD samples). [file elife-49558-supp2.xlsx]

## Sheet: deSeq2_KD_vs_Scrambled
	baseMean	log2FoldChange* (KD in relative to Scrambled control)	stat	pvalue	padj	*log2FoldChange is expressed as changes in KD compared to scrambled control. Therefore, a positive log2FC means that the gene is upregulated in KD samples. A negative log2FC means that the gene is downregulated in KD samples
IFI6	25851.6	6.74817	27.8824	4.36181e-171	6.97279e-167
ISG15	4278.52	7.86282	27.7037	6.30038e-169	5.03589e-165
IFI44L	3283.09	5.16362	27.1878	9.0554e-163	4.82532e-159
MX1	4561.13	8.68441	26.3531	4.73332e-153	1.89167e-149
IFIT1	3886.65	8.69707	24.9427	2.56072e-137	8.18715e-134
IFIT3	4605.51	9.00861	24.8543	2.32374e-136	6.19123e-133
IFITM1	2359.52	4.42364	23.4451	1.48261e-121	3.38585e-118
OAS3	1377.81	6.12349	22.2652	8.03437e-110	1.60547e-106
OAS2	1019.89	6.19748	20.7429	1.42018e-95	2.52256e-92
LGALS3BP	4392.4	3.76473	20.6621	7.59942e-95	1.21484e-91
STAT1	3165.86	3.5878	19.6995	2.17716e-86	3.16401e-83
MX2	1072.65	6.9014	19.183	5.13524e-82	6.84099e-79
LY6E	3845.97	3.58413	18.8317	4.15115e-79	5.10464e-76
IGFBP3	9638.76	3.03555	18.1064	2.83573e-73	3.23799e-70
SAMHD1	1137.72	4.01076	17.9914	2.27451e-72	2.42402e-69
PARP14	1016.54	4.08128	17.9113	9.63195e-72	9.62352e-69
DDX58	816.803	4.52863	17.4028	7.85283e-68	7.38443e-65
IFI44	784.96	3.97663	17.0944	1.63238e-65	1.44973e-62
DDX60	461.527	5.33096	16.9439	2.13417e-64	1.79562e-61
PARP9	1027.5	3.92283	16.9003	4.4786e-64	3.57974e-61
HELZ2	1392.29	3.97939	16.8627	8.46418e-64	6.44326e-61
GPNMB	1193.59	3.75821	16.8136	1.9392e-63	1.40909e-60
PENK	2282.78	-3.88482	-16.7501	5.65547e-63	3.9308e-60
IFIH1	494.952	6.07413	15.981	1.73361e-57	1.15473e-54
AKR1C2	638.411	3.95936	15.8839	8.18578e-57	5.23431e-54
IFI27	668.667	7.08099	15.6504	3.30005e-55	2.02903e-52
PTH1R	3107.48	-3.52008	-15.1466	7.98295e-52	4.7265e-49
HERC6	653.949	7.10666	14.9472	1.62427e-50	9.27339e-48
FBXO32	1739.2	2.69697	14.7581	2.72984e-49	1.5048e-46
GBP1	372.362	3.98689	14.5275	8.10895e-48	4.32099e-45
B2M	14041.2	2.677	14.3063	1.9993e-46	1.031e-43
TUBB2B	573.739	-3.38721	-14.2641	3.66116e-46	1.82898e-43
APOL6	543.401	4.43018	14.2156	7.33556e-46	3.55353e-43
APOL1	1481.35	3.24583	14.1219	2.78208e-45	1.30807e-42
IFIT2	2868.27	7.14894	14.0279	1.05154e-44	4.80286e-42
UBA7	509.03	3.66832	13.897	6.60645e-44	2.93363e-41
DTX3L	618.768	3.02905	13.7902	2.9183e-43	1.26086e-40
PLSCR1	472.445	3.24633	13.6556	1.86842e-42	7.86014e-40
IFI35	324.651	4.58298	13.5556	7.33908e-42	3.00827e-39
PDK4	285.393	3.8682	13.5109	1.34932e-41	5.39256e-39
EPSTI1	298.605	5.41382	13.4863	1.88384e-41	7.34514e-39
IHH	238.186	-4.95346	-13.4638	2.55476e-41	9.72391e-39
UBE2L6	726.41	3.05663	13.3943	6.52937e-41	2.42741e-38
ACSL1	1357.57	2.47265	13.3868	7.22241e-41	2.62403e-38
SAMD9	501.194	3.37285	13.3364	1.42105e-40	5.04819e-38
OAS1	799.013	7.78689	13.3266	1.62106e-40	5.63355e-38
RSAD2	1336.15	8.50895	13.3071	2.10405e-40	7.15644e-38
PARP12	257.468	4.27917	13.1483	1.73979e-39	5.79423e-37
DDX60L	300.344	3.99919	13.0833	4.10278e-39	1.33851e-36
PARP10	731.202	3.18722	13.0386	7.38459e-39	2.361e-36
APOL2	5050.8	2.70455	12.8718	6.4874e-38	2.03348e-35
SELENOP	1068.01	3.44993	12.8509	8.50348e-38	2.61417e-35
AL671883.2	3007.36	2.61106	12.8018	1.60172e-37	4.83115e-35
IFITM3	2587.33	2.27505	12.7344	3.80998e-37	1.1279e-34
HLA-B	8730.4	2.58969	12.7305	4.00274e-37	1.16342e-34
CCDC152	979.852	3.47408	12.6828	7.3695e-37	2.10373e-34
APOE	3575.59	2.48548	12.6547	1.05355e-36	2.95475e-34
SAMD9L	532.643	2.89717	12.578	2.78893e-36	7.60261e-34
TRIM22	1674.15	2.45728	12.5776	2.80592e-36	7.60261e-34
OASL	1320.57	6.76552	12.3878	3.04212e-35	8.10523e-33
TNFSF10	246.103	3.59341	12.3838	3.19903e-35	8.38356e-33
AC012349.1	413.995	-3.57951	-12.3822	3.26269e-35	8.41248e-33
METTL7A	415.536	3.4749	12.3805	3.33309e-35	8.45758e-33
SOD2	6267.38	2.04821	12.3763	3.50955e-35	8.76619e-33
CSPG4	4714.17	-2.29107	-12.3562	4.50886e-35	1.1089e-32
SCIN	515.634	-2.86669	-12.2565	1.55042e-34	3.73957e-32
XAF1	467.911	3.23243	12.2556	1.56732e-34	3.73957e-32
USP18	213.338	5.14167	12.0188	2.83043e-33	6.65401e-31
C1R	7613.94	2.40189	12.0045	3.36531e-33	7.7968e-31
H19	380.464	-3.20395	-11.9219	9.10146e-33	2.07851e-30
BST2	1440.96	5.62072	11.9057	1.10576e-32	2.48968e-30
SPARCL1	2454.44	2.8208	11.8928	1.2895e-32	2.86304e-30
EIF2AK2	1173.65	2.206	11.7965	4.06749e-32	8.90725e-30
TRPV4	583.935	-3.02556	-11.7136	1.0855e-31	2.34498e-29
IL11	475.12	-3.29813	-11.6919	1.4019e-31	2.9881e-29
WWP2	3045.02	-2.44485	-11.6166	3.39382e-31	7.13863e-29
NKX3-2	210.06	-3.4744	-11.592	4.52434e-31	9.393e-29
AP001610.1	858.748	8.14126	11.5531	7.1228e-31	1.45981e-28
TACSTD2	1388.29	2.40781	11.4285	3.01331e-30	6.09756e-28
FMOD	10046.4	-2.63785	-11.3607	6.56384e-30	1.31162e-27
SLC7A5	2601.27	-2.61006	-11.3141	1.1178e-29	2.20606e-27
SPON2	786.113	2.20328	11.2719	1.8073e-29	3.52335e-27
TRIM21	310.252	3.20169	11.2478	2.37559e-29	4.57545e-27
VCAM1	323.706	3.07152	11.2329	2.81167e-29	5.35087e-27
SEMA3B	733.817	-2.75522	-11.2039	3.90215e-29	7.3388e-27
GPRC5C	328.839	-2.69003	-11.1704	5.69215e-29	1.05808e-26
ANGPTL1	355.895	3.15498	11.1451	7.56794e-29	1.39059e-26
SHISA5	1880.69	1.95261	11.129	9.06618e-29	1.62845e-26
TMEM140	388.012	3.13565	11.129	9.06033e-29	1.62845e-26
DHX58	209.089	3.90574	11.1065	1.16587e-28	2.07084e-26
IRF7	403.245	2.64112	11.0956	1.31757e-28	2.31459e-26
STAT2	1943.56	2.11732	11.0271	2.82867e-28	4.91513e-26
IGFBP6	969.773	2.82957	10.9607	5.90408e-28	1.01487e-25
GBP2	272.564	2.96594	10.9071	1.06661e-27	1.79482e-25
TRIM69	312.191	3.0248	10.908	1.05565e-27	1.79482e-25
PPL	361.058	3.14444	10.8937	1.23491e-27	2.05638e-25
COL9A2	5848.91	-2.5482	-10.8397	2.23259e-27	3.67939e-25
MEF2C	495.43	-2.3746	-10.8163	2.88162e-27	4.70057e-25
WNT11	373.996	-3.0596	-10.802	3.36856e-27	5.43938e-25
GAPDH	54598.4	-1.87828	-10.7975	3.5383e-27	5.65633e-25
PCDH9	381.19	2.54198	10.7758	4.47881e-27	7.08893e-25
PTGS2	314.684	-2.73195	-10.7737	4.58214e-27	7.18138e-25
SH3PXD2A	1632.19	-2.3555	-10.7382	6.73604e-27	1.04546e-24
MATN3	5498.32	-2.34846	-10.6723	1.37131e-26	2.10786e-24
PRAL	159.638	3.68452	10.6616	1.5386e-26	2.34247e-24
RNF213	3123.61	2.15383	10.658	1.60013e-26	2.41318e-24
BMP8B	139.136	-3.6557	-10.6528	1.69258e-26	2.52875e-24
HLA-F	259.638	3.34157	10.5351	5.9519e-26	8.80992e-24
NGEF	495.313	-2.46798	-10.5201	6.97952e-26	1.02362e-23
ANGPT1	550.633	2.71403	10.503	8.36727e-26	1.21599e-23
B3GNT7	173.65	-3.30195	-10.454	1.40422e-25	2.02232e-23
AC006064.4	21144.1	-1.91609	-10.4487	1.48574e-25	2.12063e-23
TYMP	1181.46	2.06533	10.4436	1.56765e-25	2.21773e-23
ABCA6	221.389	3.00247	10.4412	1.60763e-25	2.25435e-23
HLA-C	6237.71	2.00664	10.4108	2.21271e-25	3.07586e-23
SLC15A3	312.539	3.23973	10.3642	3.60912e-25	4.97375e-23
LAMA2	2978.93	2.27366	10.3565	3.90827e-25	5.33996e-23
PTCH1	322.865	-2.60947	-10.3073	6.52782e-25	8.84354e-23
CMPK2	454.111	7.23098	10.2615	1.051e-24	1.41187e-22
PTGFR	938.231	1.9665	10.2505	1.17752e-24	1.56865e-22
TGFBR3	488.223	2.57686	10.1799	2.4377e-24	3.22059e-22
EEF2	20805.8	-1.64411	-10.1729	2.62106e-24	3.43445e-22
TLR3	138.302	4.00535	10.0993	5.5616e-24	7.22827e-22
IGFBP2	386.179	2.48334	10.0824	6.60759e-24	8.51846e-22
ENPP1	1260.56	-2.10362	-10.0585	8.4288e-24	1.07794e-21
LEPR	453.513	2.33628	9.96298	2.21321e-23	2.80796e-21
COL12A1	45931.9	-2.36084	-9.95439	2.41304e-23	3.03739e-21
AKR1C3	230.032	2.67314	9.93403	2.96052e-23	3.69742e-21
APOL3	131.515	4.69361	9.91225	3.68244e-23	4.56338e-21
TRANK1	353.093	2.7057	9.88917	4.63866e-23	5.66058e-21
WISP2	213.354	3.41106	9.88958	4.61956e-23	5.66058e-21
COL5A1	22908.1	-1.87889	-9.86924	5.65909e-23	6.85351e-21
COL11A1	43669.4	-2.13309	-9.80894	1.03043e-22	1.23853e-20
TAP1	728.719	2.17303	9.78969	1.24675e-22	1.48735e-20
C1S	6278.9	2.00124	9.75119	1.82314e-22	2.15887e-20
CD74	217.919	3.22528	9.73901	2.05547e-22	2.41609e-20
AC105020.4	383.236	-2.38109	-9.72937	2.25986e-22	2.63694e-20
VEGFA	5251.34	-1.74293	-9.68466	3.50386e-22	4.05889e-20
ISLR	1383.82	1.86848	9.66929	4.07199e-22	4.68309e-20
TGM2	200.782	-3.05606	-9.64295	5.26533e-22	5.96962e-20
ZNFX1	1302.64	1.95999	9.64328	5.2482e-22	5.96962e-20
OLFML3	4272.22	2.06571	9.63371	5.76123e-22	6.48584e-20
DKK1	558.365	2.22149	9.5974	8.19844e-22	9.16505e-20
PLIN2	1328.67	1.97669	9.50699	1.96263e-21	2.17879e-19
COL21A1	126.12	3.71494	9.50269	2.04546e-21	2.25509e-19
TNFRSF10D	374.056	-2.19231	-9.49868	2.12567e-21	2.32746e-19
DSG2	224.934	-2.67416	-9.44771	3.46339e-21	3.76638e-19
CFB	153.77	3.64389	9.42472	4.31257e-21	4.65816e-19
CHSY1	876.801	-1.77427	-9.42252	4.40406e-21	4.72506e-19
KRT16	2544.43	-1.85993	-9.40533	5.18679e-21	5.52773e-19
LDLRAD4	413.207	-2.62104	-9.37386	6.99276e-21	7.40307e-19
TMSB4X	2891.07	1.83772	9.36636	7.50745e-21	7.89566e-19
CSF1	236.63	2.56841	9.30388	1.35414e-20	1.41486e-18
ADH1B	432.727	5.44018	9.2449	2.35468e-20	2.44428e-18
EPYC	210.741	-3.11352	-9.21921	2.99301e-20	3.08686e-18
PLEKHA4	302.877	2.27333	9.2088	3.29798e-20	3.37959e-18
PSMB9	155.505	3.46242	9.17034	4.71531e-20	4.80121e-18
COL4A1	3724.95	1.85073	9.15226	5.57554e-20	5.64117e-18
HLA-DRA	146.042	3.635	9.14199	6.13141e-20	6.16458e-18
HLA-E	2538.07	1.8229	9.11437	7.91273e-20	7.90581e-18
PSMB8	350.126	2.21106	9.10446	8.66955e-20	8.60817e-18
LRRC75A-AS1	2183.11	-1.66148	-9.10137	8.91962e-20	8.8018e-18
EEF1A2	85.5093	-4.38046	-9.08673	1.02067e-19	1.00101e-17
IL1RL1	353.564	-2.11211	-9.06808	1.21135e-19	1.18077e-17
PSAT1	342.242	-2.30836	-9.0661	1.23355e-19	1.19512e-17
EIF4B	4365.99	-1.50167	-9.03344	1.6636e-19	1.60207e-17
ILDR2	80.7784	-4.39828	-9.02631	1.77556e-19	1.69964e-17
SP100	694.343	1.78183	9.01359	1.99414e-19	1.88629e-17
RFLNB	244.938	-2.55458	-9.01366	1.9929e-19	1.88629e-17
CHI3L2	834.553	-2.08904	-9.00751	2.10792e-19	1.98219e-17
IFI16	641.835	1.85929	8.99033	2.46497e-19	2.30439e-17
RPS2	6926.7	-1.54505	-8.9629	3.16249e-19	2.93928e-17
AOC2	181.153	-2.89195	-8.90804	5.19407e-19	4.79957e-17
MMP7	461.012	2.15206	8.89865	5.65292e-19	5.19354e-17
ANKRD6	353.342	-2.27714	-8.89598	5.79074e-19	5.28976e-17
NFE2L2	553.804	1.95697	8.88639	6.31258e-19	5.73369e-17
TRIM25	533.874	2.08369	8.8841	6.44388e-19	5.81988e-17
MMP16	626.335	-2.40452	-8.87622	6.91732e-19	6.21238e-17
CILP2	899.942	-1.77997	-8.85727	8.1995e-19	7.32275e-17
ASIC1	106.873	-3.28073	-8.85639	8.26478e-19	7.34005e-17
CIDEC	137.859	3.11728	8.85523	8.35093e-19	7.37558e-17
HILPDA	690.068	-1.88991	-8.8466	9.02229e-19	7.92474e-17
RPLP0	7597.95	-1.53581	-8.83676	9.8535e-19	8.56076e-17
RPL4	7895.74	-1.53878	-8.83689	9.84202e-19	8.56076e-17
SMPD3	101.422	-3.25085	-8.82865	1.05945e-18	9.15481e-17
BMPER	251.464	2.3286	8.82459	1.09862e-18	9.44227e-17
HLA-DRB1	394.775	2.60142	8.8201	1.14359e-18	9.77613e-17
AC126696.2	327.666	-2.25487	-8.81639	1.18209e-18	1.00516e-16
SP110	148.599	2.89967	8.79507	1.42958e-18	1.20917e-16
P3H2	362.548	-2.02257	-8.79306	1.4554e-18	1.22453e-16
IFIT5	309.11	2.18385	8.78048	1.62778e-18	1.36239e-16
TFPI	588.677	1.77771	8.7607	1.94044e-18	1.61524e-16
SAA1	169.759	2.7155	8.75956	1.96019e-18	1.61524e-16
PAPSS2	5211.88	-1.68336	-8.75969	1.9579e-18	1.61524e-16
VIT	675.789	1.91387	8.74926	2.14765e-18	1.76063e-16
BTN3A2	186.842	2.55529	8.74549	2.22049e-18	1.81106e-16
SLC7A8	275.991	2.57752	8.72968	2.55393e-18	2.07244e-16
DPEP1	211.73	2.98023	8.70827	3.08546e-18	2.49112e-16
EEF1A1	52950	-1.45093	-8.70486	3.17963e-18	2.55425e-16
FTH1	4395.91	1.68325	8.70207	3.25887e-18	2.60481e-16
FGF14	2456.12	1.67228	8.69902	3.34762e-18	2.66244e-16
MME	1018.56	2.11502	8.68676	3.72932e-18	2.95133e-16
NQO1	241.356	2.29214	8.68276	3.86267e-18	3.04181e-16
PPM1K	353.254	2.20514	8.6787	4.00315e-18	3.13698e-16
REPS2	105.474	3.45462	8.67537	4.12218e-18	3.2145e-16
LAMA3	379.768	2.53057	8.66748	4.41776e-18	3.42827e-16
FN1	650359	-1.63839	-8.65972	4.72941e-18	3.65238e-16
ADAR	1641.26	1.56381	8.65264	5.03223e-18	3.86756e-16
MGP	2292.21	1.81125	8.64928	5.18246e-18	3.96396e-16
CCL5	179.767	6.03878	8.62717	6.28871e-18	4.78721e-16
ODF3B	244.044	2.25078	8.6132	7.10507e-18	5.38301e-16
DTNA	161.623	2.61024	8.60859	7.3967e-18	5.57753e-16
SMIM5	143.648	-2.68996	-8.60227	7.8155e-18	5.86566e-16
EPS8L2	698.738	-1.78141	-8.59685	8.19317e-18	6.12037e-16
DHCR24	602.859	1.77941	8.59133	8.59702e-18	6.39218e-16
HERC5	174.679	6.01442	8.58555	9.04056e-18	6.69085e-16
TTC9	78.5072	-3.93002	-8.57999	9.48794e-18	6.9896e-16
CMIP	138.886	-2.84048	-8.56774	1.05532e-17	7.73872e-16
RF01972	81.6062	-3.52599	-8.56461	1.08444e-17	7.91592e-16
PSMB8-AS1	222.742	2.35133	8.51801	1.62317e-17	1.17946e-15
MMP10	75.8491	-4.70587	-8.50324	1.84364e-17	1.3336e-15
EFEMP1	361.542	2.09064	8.49361	2.00322e-17	1.4425e-15
HIST1H2AC	758.128	1.6428	8.49047	2.05801e-17	1.47531e-15
PIK3R1	1686.04	1.9972	8.47114	2.43007e-17	1.73425e-15
C19orf66	365.249	2.08721	8.45846	2.70943e-17	1.92502e-15
AKR1C1	183.274	2.41262	8.45572	2.77365e-17	1.96193e-15
EBF1	408.213	2.02456	8.44778	2.96888e-17	2.0839e-15
CHST3	4463.02	-2.02217	-8.44765	2.97216e-17	2.0839e-15
CACNA1H	71.4564	-4.48256	-8.43916	3.19623e-17	2.23122e-15
FBLN1	3954.14	1.64449	8.43264	3.37947e-17	2.34888e-15
TLDC2	87.9279	3.66147	8.42821	3.50991e-17	2.42898e-15
RARRES3	99.8247	4.5312	8.42764	3.5271e-17	2.43036e-15
SOX9	797.365	-1.99391	-8.42337	3.6582e-17	2.50987e-15
HCG4P11	96.5772	3.81327	8.38895	4.90513e-17	3.351e-15
SPP1	1311.94	-1.76367	-8.38531	5.05932e-17	3.44163e-15
TAGLN	4123.49	1.65193	8.38335	5.14402e-17	3.48442e-15
MAP2K6	172.768	2.71613	8.3814	5.23027e-17	3.5279e-15
PLA2G4A	391.767	-2.16895	-8.37723	5.41859e-17	3.63956e-15
C12orf60	1017.37	1.77395	8.37268	5.63233e-17	3.7673e-15
IBSP	8943.63	-4.91995	-8.36724	5.89856e-17	3.92e-15
COL27A1	477.011	-1.89328	-8.36701	5.90968e-17	3.92e-15
SGMS2	622.788	-2.11691	-8.35713	6.4262e-17	4.24501e-15
NMI	133.155	2.98826	8.34992	6.83121e-17	4.49398e-15
THBS1	26658.7	1.34277	8.30558	9.93299e-17	6.50774e-15
XYLT1	3231.37	-1.65767	-8.29913	1.04881e-16	6.84336e-15
PTGES	1812.09	-1.67937	-8.29343	1.10033e-16	7.15036e-15
GPRC5A	142.544	-2.853	-8.26437	1.40436e-16	9.08912e-15
PMEPA1	1904.71	-1.59713	-8.23338	1.82005e-16	1.1732e-14
CHST7	279.293	2.00523	8.2256	1.94208e-16	1.24683e-14
CHAC1	146.977	-2.62973	-8.21976	2.03916e-16	1.30392e-14
COL4A2	5207.53	1.68585	8.21033	2.20589e-16	1.40491e-14
LRRC75A	1030.1	-1.62375	-8.19763	2.45164e-16	1.55523e-14
TMEM150C	456.299	1.78332	8.19116	2.58729e-16	1.6348e-14
EEF1B2	2593.35	-1.51671	-8.14347	3.84105e-16	2.41744e-14
ITGBL1	8968.27	1.70626	8.13469	4.13e-16	2.58911e-14
ANGPTL2	1352.55	-1.52504	-8.12861	4.34254e-16	2.71171e-14
ADPRHL1	1171.56	-1.69859	-8.11715	4.77247e-16	2.96859e-14
OBSL1	2129.79	-1.41832	-8.10898	5.10449e-16	3.16281e-14
CHADL	436.121	-1.72948	-8.10338	5.34549e-16	3.29934e-14
KCNN4	516.176	-1.8781	-8.07282	6.86921e-16	4.22351e-14
F2R	221.923	2.37562	8.07217	6.90598e-16	4.22985e-14
CYBRD1	2268.21	1.40096	8.06609	7.25856e-16	4.42883e-14
CLEC2B	139.475	2.70624	8.04889	8.35483e-16	5.07834e-14
NKD1	95.8049	-2.85951	-8.02129	1.04639e-15	6.33621e-14
GAS6	3036.29	1.91366	8.01793	1.07542e-15	6.48742e-14
HGF	104.528	3.02541	7.99219	1.32558e-15	7.96643e-14
SLC14A1	101.563	2.98304	7.97453	1.52961e-15	9.15816e-14
BTN3A3	192.441	2.32415	7.97255	1.55431e-15	9.27133e-14
MIOS	581.746	1.62697	7.95795	1.74913e-15	1.03946e-13
PIM1	282.627	-2.18394	-7.95609	1.7756e-15	1.05129e-13
OLFML2A	117.89	2.73877	7.95434	1.80096e-15	1.05846e-13
SLC13A5	64.1693	-3.87302	-7.95457	1.79752e-15	1.05846e-13
LOXL1	778.984	1.57752	7.95043	1.85864e-15	1.08836e-13
RPS3A	2427.51	-1.48122	-7.94564	1.93191e-15	1.12713e-13
BTN3A1	231.795	2.14151	7.9441	1.95603e-15	1.13706e-13
MFAP4	704.031	1.89962	7.92711	2.24312e-15	1.29922e-13
ULBP1	75.9012	-3.45418	-7.91185	2.53585e-15	1.46347e-13
GPC1	2180.38	-1.68048	-7.90951	2.58408e-15	1.48594e-13
RPL3	5820.63	-1.38127	-7.89288	2.95282e-15	1.69189e-13
PCSK7	2673.97	1.45552	7.88169	3.22994e-15	1.84407e-13
TRIM38	355.325	1.97497	7.87376	3.44152e-15	1.95787e-13
JAG2	67.697	-3.44326	-7.86619	3.65613e-15	2.07259e-13
PLCD1	940.804	-1.49241	-7.8627	3.7595e-15	2.12365e-13
SMTN	1192.83	-1.60309	-7.84474	4.33864e-15	2.44217e-13
PIEZO1	3295.72	-1.41167	-7.83271	4.77481e-15	2.67825e-13
KITLG	280.228	1.88574	7.82972	4.88941e-15	2.73294e-13
ARSI	227.305	-2.09786	-7.81904	5.32281e-15	2.96482e-13
FAM198A	167.289	-2.18793	-7.80077	6.15302e-15	3.41535e-13
PDGFRB	3881.29	1.46089	7.78683	6.8709e-15	3.78753e-13
CTSB	6478.62	1.29393	7.78723	6.84932e-15	3.78753e-13
RPL7	2888.43	-1.45505	-7.78513	6.9639e-15	3.8256e-13
AREG	248.542	-1.9372	-7.74419	9.61957e-15	5.26638e-13
RPL5	3465.34	-1.32805	-7.71637	1.19688e-14	6.53015e-13
FABP3	196.197	-2.38789	-7.71304	1.22851e-14	6.67994e-13
RND3	1230.59	1.48596	7.70682	1.28995e-14	6.99021e-13
SPECC1	555.443	-1.67126	-7.701	1.3501e-14	7.29144e-13
CFH	1399.04	1.48721	7.69985	1.36222e-14	7.33212e-13
ENO2	1120.42	-1.48297	-7.68174	1.56937e-14	8.41876e-13
ACSM5	79.9672	3.36877	7.67849	1.60969e-14	8.6062e-13
CERK	503.412	-1.59162	-7.67279	1.68298e-14	8.96805e-13
COL1A2	296622	-1.48995	-7.66313	1.81457e-14	9.63711e-13
PDE4D	234.123	-2.03317	-7.66129	1.84081e-14	9.74411e-13
VGLL3	576.177	1.68335	7.66016	1.85701e-14	9.79743e-13
SLC25A6	1109.32	-1.39646	-7.65457	1.93956e-14	1.01993e-12
SLPI	195.128	2.5524	7.64593	2.07444e-14	1.08728e-12
IER3	371.517	-1.90759	-7.64116	2.15265e-14	1.12458e-12
LINC00511	189.383	-2.12776	-7.60973	2.74667e-14	1.43023e-12
SLC46A3	279.398	1.89147	7.60445	2.86123e-14	1.48505e-12
GEM	382.748	1.73369	7.59976	2.96671e-14	1.53481e-12
ATG10	2132.31	-1.41359	-7.59155	3.16112e-14	1.63012e-12
FGF1	282.508	-2.23786	-7.57713	3.53288e-14	1.81597e-12
NLRC5	229.49	2.15002	7.55999	4.03092e-14	2.06533e-12
AOX1	729.338	1.55429	7.53294	4.96119e-14	2.53385e-12
AL162258.2	255.434	-2.31168	-7.52875	5.12293e-14	2.60813e-12
LOXL2	2603.09	-1.49008	-7.51133	5.85279e-14	2.97024e-12
CST3	6325.18	1.27221	7.50726	6.03786e-14	3.05447e-12
NGF	55.6735	-3.75047	-7.49375	6.69324e-14	3.37534e-12
RPS23	2698.71	-1.35498	-7.48921	6.92905e-14	3.48327e-12
GLUL	5572.62	1.35903	7.48733	7.02898e-14	3.52242e-12
ZCCHC2	141.495	2.3365	7.46439	8.36858e-14	4.18063e-12
UNC5B	1999.93	-1.46335	-7.45826	8.76749e-14	4.36626e-12
GFPT2	778.172	-1.45017	-7.44336	9.81537e-14	4.87293e-12
SLAMF9	74.087	-3.12328	-7.44251	9.87868e-14	4.88918e-12
HLA-DPA1	244.659	1.97651	7.39936	1.36845e-13	6.75188e-12
CITED2	235.661	2.32019	7.39081	1.45937e-13	7.1783e-12
MELTF-AS1	111.335	-2.57192	-7.38915	1.47772e-13	7.24626e-12
C7	113.152	2.49187	7.36809	1.73096e-13	8.4621e-12
STOM	749.064	1.45934	7.36058	1.83109e-13	8.92431e-12
C5orf30	145.924	2.25547	7.34819	2.00913e-13	9.76227e-12
CALHM5	218.233	1.90954	7.34185	2.1066e-13	1.02049e-11
LPAR4	120.48	-2.74791	-7.32465	2.39528e-13	1.15683e-11
CLDN4	145.395	-2.12444	-7.29413	3.00586e-13	1.44734e-11
FITM2	340.211	-1.73107	-7.28915	3.11917e-13	1.49739e-11
THEMIS2	334.209	1.69685	7.27858	3.37361e-13	1.60922e-11
PSME1	190.036	2.01817	7.27855	3.37438e-13	1.60922e-11
SYNE3	489.239	1.68178	7.27823	3.38233e-13	1.60922e-11
ICAM5	100.317	-2.70673	-7.26732	3.66697e-13	1.73947e-11
FST	891.433	1.76727	7.25793	3.93048e-13	1.85895e-11
FGFR2	292.497	-1.92408	-7.25288	4.08014e-13	1.92405e-11
EPS8	863.149	1.40331	7.24009	4.48388e-13	2.10821e-11
PRSS23	1795.57	1.3492	7.23164	4.77183e-13	2.23702e-11
HEXB	1261.95	1.38806	7.22053	5.17857e-13	2.4206e-11
AC068888.1	1135.78	-1.32768	-7.20902	5.63578e-13	2.62663e-11
SMOX	216.529	-1.95372	-7.20634	5.74744e-13	2.67089e-11
SLC8A3	63.0982	-5.02892	-7.18713	6.61693e-13	3.06603e-11
EPHX1	453.727	1.74577	7.1847	6.73537e-13	3.1119e-11
IRF6	479.107	-3.70535	-7.18345	6.79732e-13	3.13147e-11
FSIP1	1599.2	1.26301	7.17453	7.25541e-13	3.3329e-11
RPS6	6805.51	-1.33363	-7.17311	7.33117e-13	3.35805e-11
GCHFR	137.88	2.43665	7.17212	7.38448e-13	3.37281e-11
SSH2	366.187	1.83805	7.1696	7.52178e-13	3.42573e-11
AC008945.1	59.7763	3.76438	7.16434	7.81605e-13	3.54964e-11
CCND3	339.457	1.69125	7.16031	8.04964e-13	3.64537e-11
AGRN	1202.93	1.561	7.14957	8.70492e-13	3.93099e-11
TXNIP	5534.36	1.27614	7.14647	8.90385e-13	4.00949e-11
FKBP5	2606.7	1.26777	7.13572	9.62796e-13	4.32339e-11
LMOD1	122.523	2.44677	7.12028	1.0771e-12	4.8231e-11
JUNB	1407.85	-1.31617	-7.11791	1.0958e-12	4.89313e-11
CAV1	694.28	1.51608	7.11225	1.14168e-12	5.08381e-11
CD248	773.936	1.66414	7.10865	1.17187e-12	5.20376e-11
TCN2	119.634	2.48255	7.10346	1.21675e-12	5.38807e-11
AL136131.3	269.939	-1.92414	-7.05091	1.77754e-12	7.84965e-11
SHC4	457.688	-1.98802	-7.04376	1.87114e-12	8.24023e-11
SORT1	795.803	1.51055	7.02905	2.07942e-12	9.1323e-11
SRPX	3879.21	1.24228	7.02342	2.16509e-12	9.48249e-11
HSPB1	1438.22	1.28528	7.01879	2.23806e-12	9.7753e-11
APOD	1591.9	1.56312	7.00929	2.39528e-12	1.04335e-10
GLIPR1	312.261	1.63955	6.99692	2.61649e-12	1.13661e-10
AL138963.3	4778.31	-1.18245	-6.99001	2.74859e-12	1.19076e-10
PLPP3	464.266	1.72687	6.98847	2.77893e-12	1.1975e-10
LOX	2024.39	-1.53796	-6.98846	2.77914e-12	1.1975e-10
PLOD2	8388.21	-1.56438	-6.97662	3.02362e-12	1.29934e-10
SECTM1	57.1314	3.79754	6.96306	3.32952e-12	1.42696e-10
PROS1	473.775	1.49293	6.93079	4.18486e-12	1.78875e-10
RPS8	3373.34	-1.21469	-6.92364	4.40175e-12	1.87643e-10
DPYD	508.455	1.47075	6.92276	4.42939e-12	1.8832e-10
IER3-AS1	191.327	-1.99088	-6.91287	4.74953e-12	2.00862e-10
TRIM5	226.89	1.80489	6.91299	4.74559e-12	2.00862e-10
RTP4	99.8712	5.47809	6.90722	4.94241e-12	2.08468e-10
TENM3	556.617	-1.82267	-6.90574	4.99439e-12	2.10106e-10
CTSK	1876.23	1.38801	6.90007	5.1978e-12	2.18089e-10
EIF3L	592.275	-1.3776	-6.89886	5.24201e-12	2.19369e-10
AL355075.4	4565.07	-3.7896	-6.88995	5.58101e-12	2.32945e-10
EPB41L2	658.18	-1.52298	-6.88334	5.84639e-12	2.43386e-10
GAS6-AS1	873.109	1.77773	6.88138	5.92771e-12	2.46131e-10
CAPG	388.945	1.54354	6.87831	6.05656e-12	2.50829e-10
FAP	699.645	-1.62483	-6.86494	6.65183e-12	2.7477e-10
COL4A2-AS1	231.19	1.97959	6.85806	6.98041e-12	2.876e-10
BEST1	2612.63	1.47918	6.84796	7.49082e-12	3.07836e-10
RPL15	4133.51	-1.20088	-6.83459	8.22397e-12	3.36236e-10
RPS6KA2	243.255	1.73146	6.8346	8.22344e-12	3.36236e-10
TMIE	53.4448	-3.27077	-6.82882	8.5613e-12	3.49135e-10
PFKP	1416.89	-1.26399	-6.82658	8.69652e-12	3.53747e-10
WSB1	1000.56	-1.27935	-6.81661	9.32121e-12	3.78195e-10
IMPAD1	1593.37	-1.28159	-6.81189	9.6323e-12	3.89828e-10
S100A13	856.612	-1.50548	-6.80466	1.01291e-11	4.08899e-10
MDK	195.625	2.23304	6.80124	1.03722e-11	4.17656e-10
CDO1	390.453	1.61863	6.79474	1.08508e-11	4.35833e-10
TPT1	7497.15	-1.15091	-6.78233	1.18252e-11	4.73779e-10
LPL	70.6293	-2.70548	-6.77999	1.20183e-11	4.80311e-10
CLEC3B	83.0756	2.92929	6.77097	1.27922e-11	5.09967e-10
RGS16	86.4025	-2.80114	-6.7685	1.30123e-11	5.17451e-10
SERINC5	565.193	-1.45007	-6.76279	1.35358e-11	5.36933e-10
SCARB2	2785.07	1.19642	6.75504	1.42798e-11	5.65044e-10
IGFBP7	3922.84	1.31784	6.75435	1.43478e-11	5.66331e-10
IFITM5	46.8677	-4.42002	-6.75139	1.46434e-11	5.76574e-10
FAT1	3979.08	-1.26809	-6.74961	1.4824e-11	5.82253e-10
MGST1	352.376	1.52504	6.74772	1.50185e-11	5.88446e-10
SMOC2	612.51	-1.44432	-6.74258	1.55597e-11	6.0816e-10
NTRK2	661.903	-1.5625	-6.72169	1.7963e-11	7.00381e-10
ZBED3	109.478	2.45541	6.72083	1.8069e-11	7.02802e-10
NFKBIA	366.677	1.51796	6.71943	1.82438e-11	7.07875e-10
RAP2A	846.748	1.4843	6.68699	2.2781e-11	8.81785e-10
COL28A1	57.0154	3.29848	6.67836	2.41623e-11	9.32991e-10
ANKRD28	1126.27	1.4538	6.66663	2.61743e-11	1.00825e-09
JADE2	500.185	1.54651	6.65688	2.79702e-11	1.07484e-09
OAF	254.754	-1.75877	-6.65376	2.85701e-11	1.09526e-09
KIF26B	541.704	-1.43528	-6.65036	2.92384e-11	1.11819e-09
FER1L4	263.478	-1.84387	-6.63139	3.32535e-11	1.26871e-09
ANGPTL4	824.353	-1.279	-6.62382	3.50023e-11	1.33225e-09
PGAM2	147.375	-1.91451	-6.60941	3.85866e-11	1.46519e-09
PFKFB4	344.271	-1.49361	-6.5917	4.34813e-11	1.64714e-09
GALNT18	181.674	-1.86815	-6.5904	4.38631e-11	1.65767e-09
BGN	7515.58	-1.552	-6.56811	5.09594e-11	1.92131e-09
ATP1A2	55.1103	4.26648	6.56072	5.35478e-11	2.01415e-09
NEXN	159.455	1.89738	6.56017	5.37454e-11	2.01684e-09
AC037198.2	678.353	1.28679	6.55976	5.3895e-11	2.01772e-09
COL15A1	252.821	-3.80455	-6.54798	5.83218e-11	2.17835e-09
SHC3	74.4751	2.70168	6.54722	5.86163e-11	2.17916e-09
NRP1	309.47	1.52559	6.54726	5.86025e-11	2.17916e-09
CAMK2A	41.4229	-3.58564	-6.54444	5.97197e-11	2.21503e-09
MATN4	4637.71	-3.03841	-6.54011	6.14746e-11	2.27485e-09
FBLN5	386.166	1.6938	6.5194	7.05881e-11	2.60606e-09
ALOX15B	662.976	1.39773	6.5184	7.10615e-11	2.61749e-09
IFITM10	598.352	-1.30398	-6.51713	7.1664e-11	2.63361e-09
PI15	47.2025	-4.59055	-6.50971	7.52982e-11	2.76082e-09
RNF144A	641.261	-1.5293	-6.49659	8.21621e-11	3.00559e-09
DBNDD1	115.27	-2.44388	-6.49093	8.53076e-11	3.10759e-09
ABCA9	52.5842	3.27468	6.49088	8.53392e-11	3.10759e-09
PAPPA2	94.9037	-2.35792	-6.4794	9.20907e-11	3.33068e-09
RPSA	3465.78	-1.23558	-6.47941	9.20846e-11	3.33068e-09
SCPEP1	672.132	1.7072	6.47952	9.20165e-11	3.33068e-09
COL9A3	4711.95	-3.12983	-6.47876	9.24818e-11	3.33728e-09
SYNPO2	103.952	2.46673	6.45702	1.06783e-10	3.84468e-09
PITPNC1	166.361	-1.86077	-6.45506	1.08174e-10	3.88599e-09
PLEKHF1	117.187	2.17747	6.45426	1.08751e-10	3.89798e-09
PDGFA	162.924	-1.9315	-6.45169	1.10607e-10	3.95562e-09
MYO10	1043.01	-1.26612	-6.4405	1.1908e-10	4.24914e-09
LOXL4	268.358	-1.65054	-6.43087	1.26872e-10	4.51708e-09
DPYSL4	121.565	-2.04813	-6.42594	1.31057e-10	4.65571e-09
GAS5	1204.68	-1.313	-6.42519	1.31707e-10	4.66843e-09
MFGE8	6993.42	1.05615	6.41264	1.43021e-10	5.05827e-09
ZNF469	152.553	-2.1379	-6.39668	1.58796e-10	5.60379e-09
AC004551.1	76.2135	5.58712	6.38222	1.74542e-10	6.14586e-09
GRN	1545.83	1.19806	6.37344	1.84833e-10	6.49394e-09
PTK2B	261.001	1.85067	6.36537	1.94816e-10	6.82965e-09
IGFBP7-AS1	1422.87	1.2972	6.341	2.28279e-10	7.98527e-09
LRRK2	328.956	1.69542	6.3215	2.59034e-10	9.04129e-09
DCLK1	145.935	1.89766	6.31641	2.67705e-10	9.32358e-09
CP	218.845	2.00089	6.31607	2.68294e-10	9.3238e-09
ANTXR2	854.932	1.55754	6.30694	2.84599e-10	9.86899e-09
SMIM14	678.01	1.25324	6.30529	2.87663e-10	9.95365e-09
GBP3	79.4764	2.4337	6.29231	3.12772e-10	1.07758e-08
GPT2	407.289	-1.44548	-6.29239	3.12608e-10	1.07758e-08
PTGDS	172.51	2.10067	6.28773	3.2214e-10	1.10747e-08
KCTD11	501.038	-1.37063	-6.27927	3.40159e-10	1.1669e-08
CASP1	53.0791	4.12165	6.27382	3.52288e-10	1.20593e-08
AC109446.3	382.292	-1.42337	-6.26489	3.73091e-10	1.27441e-08
ITGA2	105.688	2.08939	6.26443	3.74196e-10	1.27546e-08
TXNRD1	967.942	1.28302	6.26172	3.80748e-10	1.29503e-08
LAP3	605.29	1.44348	6.2493	4.12307e-10	1.39939e-08
ACSL5	60.6557	2.97539	6.24624	4.20456e-10	1.42403e-08
GARS	1215.05	-1.23277	-6.24284	4.29689e-10	1.45222e-08
IL17B	38.5913	-3.37944	-6.24061	4.35858e-10	1.46996e-08
BEX3	1020.25	1.29288	6.23635	4.4789e-10	1.50736e-08
MELTF	1190.18	-2.89314	-6.22825	4.71682e-10	1.58351e-08
CALU	5071.4	-1.14195	-6.22798	4.72496e-10	1.58351e-08
CPED1	136.547	2.03862	6.22573	4.79322e-10	1.60302e-08
SQSTM1	1882.96	1.10429	6.22037	4.95983e-10	1.65528e-08
AC009139.1	35.7735	-3.73381	-6.22003	4.97066e-10	1.65544e-08
SLC9A9	143.503	1.91144	6.21699	5.06776e-10	1.68427e-08
AL138767.1	280.79	-1.77062	-6.19905	5.68057e-10	1.88402e-08
ACO1	763.114	-1.2051	-6.19824	5.70986e-10	1.88981e-08
ABCC3	261.209	1.58895	6.19725	5.74583e-10	1.89778e-08
TRPS1	2396.09	-1.4009	-6.19632	5.77995e-10	1.90512e-08
LSAMP	215.476	-1.58619	-6.19383	5.87206e-10	1.9315e-08
APLP2	2591.84	1.11075	6.19019	6.00912e-10	1.97252e-08
CDH15	75.8914	-2.46278	-6.18067	6.38319e-10	2.09102e-08
DMP1	36.4511	-3.89181	-6.17598	6.57555e-10	2.14963e-08
NFATC2	112.018	-2.06054	-6.171	6.78575e-10	2.21382e-08
VEGFC	144.003	1.89774	6.15605	7.45818e-10	2.42824e-08
RCOR2	154.438	-1.77486	-6.15247	7.62859e-10	2.47867e-08
STC2	4178.15	-1.27157	-6.14821	7.83612e-10	2.54094e-08
ALPL	457.432	-3.27409	-6.14551	7.97074e-10	2.57936e-08
PYCR1	951.204	-1.4515	-6.14443	8.02524e-10	2.59175e-08
PML	345.059	1.52872	6.14265	8.11553e-10	2.61562e-08
PARP2	3605.87	-3.4996	-6.13654	8.43386e-10	2.71275e-08
LBH	523.499	1.26498	6.13444	8.54609e-10	2.73783e-08
PGF	584.988	-1.34959	-6.1345	8.54294e-10	2.73783e-08
JUN	1544	1.10636	6.13311	8.61798e-10	2.75534e-08
EDNRA	306.317	-1.47796	-6.13124	8.71981e-10	2.78233e-08
RAB31	3595.61	1.09161	6.13052	8.75944e-10	2.78941e-08
GAN	254.854	-1.55712	-6.12632	8.99367e-10	2.85831e-08
KANK4	275.129	-1.84425	-6.1227	9.20044e-10	2.91822e-08
GLRX	285.52	1.50259	6.10962	9.98694e-10	3.16141e-08
SLC7A1	510.657	-1.37282	-6.1057	1.02352e-09	3.23359e-08
RPS2P5	202.167	-1.68144	-6.10418	1.0333e-09	3.25804e-08
INHBA	1016.99	-1.15486	-6.0891	1.13548e-09	3.57319e-08
PRKD1	278.056	1.65595	6.08534	1.16245e-09	3.65086e-08
HSPG2	7888.12	-1.43584	-6.08013	1.20086e-09	3.7641e-08
SLC27A2	35.6713	-4.00616	-6.07632	1.22974e-09	3.8471e-08
GPR153	681.88	-1.22059	-6.07273	1.25754e-09	3.92637e-08
TNNT3	52.5303	-2.70424	-6.06849	1.29118e-09	4.02356e-08
LTBP2	2054.03	1.53496	6.06809	1.29439e-09	4.02569e-08
SLC16A1	1104.51	-1.52207	-6.05503	1.40395e-09	4.35796e-08
AC138028.4	359.462	-1.35792	-6.05391	1.41372e-09	4.3798e-08
CNTNAP2	116.901	2.08824	6.04197	1.52246e-09	4.70757e-08
REV3L	597.094	1.25804	6.03396	1.59992e-09	4.93752e-08
IRF2	128.673	1.91794	6.02262	1.71619e-09	5.28614e-08
ZBTB16	600.575	1.59985	6.00883	1.86866e-09	5.7447e-08
SORCS2	576.957	-1.2334	-6.00104	1.96056e-09	6.01565e-08
NOTUM	92.5101	-2.13629	-5.99507	2.03395e-09	6.22889e-08
AC138028.2	302.2	-1.39217	-5.98865	2.1159e-09	6.46745e-08
RPS3	4857.23	-1.19794	-5.98082	2.22022e-09	6.77335e-08
NUDT4	531.805	1.35349	5.97619	2.28411e-09	6.955e-08
FPR1	97.6885	2.05422	5.97122	2.35485e-09	7.14351e-08
AC005005.3	119.747	-1.87065	-5.97121	2.35495e-09	7.14351e-08
KDM7A	415.926	-1.42191	-5.96979	2.37556e-09	7.19236e-08
FAM129A	274.747	-1.51966	-5.96408	2.46015e-09	7.42036e-08
SEMA3F	138.389	-1.79039	-5.96437	2.45586e-09	7.42036e-08
NEDD9	527.936	1.22371	5.96193	2.49282e-09	7.50474e-08
AEBP1	4723.63	-1.40484	-5.95705	2.56825e-09	7.70692e-08
STK38L	1473.45	-1.29589	-5.95697	2.56962e-09	7.70692e-08
ADARB1	349.398	1.46615	5.95242	2.64207e-09	7.9094e-08
FZD9	85.1007	-2.17468	-5.9497	2.6863e-09	8.02677e-08
CPT1A	181.948	1.60526	5.9492	2.69451e-09	8.03626e-08
PAMR1	331.398	-1.38413	-5.94676	2.7351e-09	8.14215e-08
PLA2G16	68.6907	2.36598	5.94611	2.74593e-09	8.15919e-08
ATP2B4	2026.65	1.3928	5.94122	2.82911e-09	8.39074e-08
FAM20A	183.653	1.64773	5.91871	3.24469e-09	9.60547e-08
OLFML1	75.8988	2.63573	5.9182	3.25483e-09	9.61768e-08
ADAMTS6	540.561	-1.24187	-5.91578	3.30314e-09	9.74243e-08
PRSS53	83.4068	-2.15824	-5.90744	3.47472e-09	1.02296e-07
SNAI2	1118.47	1.11951	5.90184	3.59473e-09	1.05635e-07
DKK3	1186.27	1.0883	5.9015	3.60205e-09	1.05656e-07
TNFSF13B	40.5783	3.66952	5.89435	3.76157e-09	1.10133e-07
PFKFB3	618.853	-1.25671	-5.89282	3.79662e-09	1.10753e-07
TMTC1	491.888	1.27467	5.89288	3.79518e-09	1.10753e-07
B4GALNT4	73.8224	-2.26674	-5.88783	3.91298e-09	1.1394e-07
SPARC	96523.3	-1.26834	-5.88687	3.93577e-09	1.14395e-07
PYGL	976.943	-1.30962	-5.8833	4.02154e-09	1.16676e-07
FARP1	907.135	-1.21549	-5.88216	4.04942e-09	1.17272e-07
PABPC4	740.93	-1.16261	-5.8712	4.32645e-09	1.25068e-07
SOX6	301.794	-1.45803	-5.86565	4.47373e-09	1.29092e-07
RGCC	82.9168	-2.50846	-5.86432	4.50972e-09	1.29896e-07
ZC3HAV1	679.579	1.17165	5.86302	4.54536e-09	1.30687e-07
SHMT2	891.077	-1.15354	-5.86198	4.57384e-09	1.3127e-07
NPC2	927.646	1.22384	5.85946	4.64389e-09	1.33042e-07
DSG3	33.8986	-3.38745	-5.84871	4.95414e-09	1.41676e-07
FZD1	909.941	1.13067	5.84362	5.1077e-09	1.45807e-07
GPM6B	54.3545	2.59965	5.83358	5.42516e-09	1.54593e-07
EFNA1	90.8092	-2.12585	-5.83136	5.49781e-09	1.56384e-07
COLGALT2	496.413	-1.20028	-5.81908	5.91727e-09	1.68017e-07
ACLY	3423.86	-1.14874	-5.79678	6.75984e-09	1.91601e-07
RPL7A	5928.98	-1.09543	-5.79624	6.78175e-09	1.91882e-07
TUBB2A	402.656	-1.47057	-5.79424	6.86307e-09	1.93839e-07
MYL9	689.095	1.14662	5.78637	7.19226e-09	2.02778e-07
HDLBP	7727.79	-1.01052	-5.7822	7.37304e-09	2.0751e-07
ADAM12	890.794	-1.32735	-5.78142	7.40714e-09	2.08103e-07
RPS4X	4154.57	-1.02808	-5.77867	7.52934e-09	2.11165e-07
RPL6	1428.81	-1.13548	-5.77665	7.62043e-09	2.13345e-07
AL356124.2	113.716	1.99476	5.773	7.78729e-09	2.17636e-07
ITGA10	1929.35	1.17884	5.77214	7.827e-09	2.18364e-07
KREMEN1	282.622	-1.37208	-5.76639	8.09897e-09	2.25558e-07
PTK7	3227.33	-1.04154	-5.76596	8.11952e-09	2.25737e-07
RPL9P9	244.512	-1.42547	-5.76525	8.15348e-09	2.26288e-07
LDLRAD2	917.07	-1.38106	-5.76322	8.25253e-09	2.2864e-07
GPD1L	138.779	1.89965	5.75587	8.6198e-09	2.38402e-07
HSPH1	432.598	1.23631	5.75505	8.66156e-09	2.39143e-07
PSME2	239.185	1.53761	5.75344	8.74481e-09	2.41025e-07
AP000785.1	52.2806	-2.61794	-5.74955	8.94828e-09	2.46209e-07
PPFIA4	718.088	-1.14361	-5.74279	9.31301e-09	2.55804e-07
RCC1	287.566	-1.34428	-5.74034	9.44853e-09	2.59081e-07
CFLAR	669.575	1.27812	5.73891	9.52869e-09	2.60832e-07
NT5DC2	515.937	-1.17369	-5.73771	9.59629e-09	2.62233e-07
SMARCD2	876.897	1.13986	5.72192	1.05326e-08	2.87328e-07
EEF1A1P5	181.84	-1.53831	-5.72074	1.06059e-08	2.88833e-07
RPS14	4170.24	-1.04625	-5.71808	1.07737e-08	2.92409e-07
ANPEP	1600.99	1.35937	5.71816	1.07683e-08	2.92409e-07
RPL23	4033.15	-1.04574	-5.70824	1.1415e-08	3.09289e-07
RIPOR3	86.3656	2.43181	5.70375	1.172e-08	3.17015e-07
KCNS1	113.674	-1.92051	-5.69942	1.20217e-08	3.24627e-07
ANKRD35	71.1503	2.21527	5.69223	1.2539e-08	3.38024e-07
PRICKLE1	191.042	-1.55833	-5.68411	1.31497e-08	3.5389e-07
ATG9B	55.9715	-2.49916	-5.68314	1.32242e-08	3.55297e-07
RRBP1	3270.02	-1.00561	-5.67551	1.38275e-08	3.70882e-07
EPHA4	224.669	1.44052	5.67078	1.42147e-08	3.8063e-07
CLMAT3	3816.17	-1.204	-5.66364	1.48196e-08	3.96165e-07
SLC1A3	159.529	1.66985	5.6611	1.50403e-08	4.01394e-07
CHST11	416.485	-1.21134	-5.65761	1.53496e-08	4.08964e-07
MTHFD2	953.85	-1.13637	-5.64847	1.61883e-08	4.30593e-07
CEBPA	86.1658	2.03068	5.64744	1.62854e-08	4.32456e-07
MMP15	53.1875	2.5456	5.63398	1.76098e-08	4.66849e-07
IFITM2	202.392	1.49909	5.62589	1.84551e-08	4.88448e-07
FAAH	79.3302	-2.08119	-5.62548	1.84993e-08	4.88809e-07
CHN1	281.975	1.36399	5.6239	1.8669e-08	4.92479e-07
ALS2CL	173.987	-1.51226	-5.61412	1.9757e-08	5.20321e-07
SLC38A5	1270.76	-1.12788	-5.61111	2.01036e-08	5.28579e-07
MRGPRF	96.4176	1.90885	5.60419	2.0923e-08	5.4922e-07
EHD3	496.849	-1.21465	-5.60159	2.12398e-08	5.56621e-07
TWIST1	429.177	1.22116	5.60016	2.14153e-08	5.60303e-07
AC090197.1	337.867	-1.29179	-5.5903	2.26677e-08	5.921e-07
PNPT1	228.38	1.65909	5.58506	2.33617e-08	6.09233e-07
CCND2	2126.64	-1.10892	-5.58472	2.34079e-08	6.09445e-07
RPL9	2475.64	-1.04421	-5.58428	2.3467e-08	6.09988e-07
MYL12A	1410.41	1.19718	5.57889	2.42064e-08	6.28188e-07
DDAH2	305.598	1.34606	5.57772	2.43687e-08	6.31373e-07
BHLHE40	738.889	-1.41376	-5.57263	2.50929e-08	6.49085e-07
MECOM	89.6019	1.95773	5.57011	2.54579e-08	6.57463e-07
KLF15	108.257	1.9325	5.56836	2.57142e-08	6.63012e-07
RPL27A	3182.23	-1.04258	-5.5673	2.5872e-08	6.66005e-07
GNB4	1035.16	-1.01777	-5.55683	2.74715e-08	7.06044e-07
CALCRL	101.075	1.86253	5.55531	2.77113e-08	7.11063e-07
CRISPLD1	435.055	-1.38819	-5.54986	2.8589e-08	7.32411e-07
GLIPR2	190.623	1.63652	5.54714	2.90386e-08	7.42739e-07
AP001010.1	41.2803	-2.68316	-5.53904	3.04138e-08	7.7667e-07
HEPH	450.111	1.24672	5.535	3.11228e-08	7.93507e-07
HNMT	179.793	1.53871	5.53318	3.14475e-08	8.0051e-07
AC020931.1	74.8276	2.20259	5.52916	3.21768e-08	8.17772e-07
TRIM56	479.321	1.23086	5.52765	3.24557e-08	8.2355e-07
TDRD7	98.2264	1.86257	5.52692	3.25902e-08	8.25654e-07
SLC39A14	2471.68	-1.11431	-5.52149	3.36134e-08	8.50227e-07
RPS24	4694.41	-0.945127	-5.521	3.37075e-08	8.51262e-07
CLEC18B	57.0541	-2.30555	-5.51934	3.40273e-08	8.57982e-07
RPL34	1975.82	-1.06165	-5.50973	3.5939e-08	9.04757e-07
TGFA	51.9966	-2.39248	-5.50867	3.61563e-08	9.08796e-07
COL11A2	10550	-3.41191	-5.50566	3.67789e-08	9.21831e-07
PHF11	131.608	1.66633	5.50561	3.67902e-08	9.21831e-07
RPS5	2472.56	-0.982958	-5.50163	3.76297e-08	9.41391e-07
ZFP36L2	457.892	1.38242	5.49816	3.83778e-08	9.58605e-07
WASF3	438.325	1.22631	5.49708	3.86137e-08	9.62994e-07
RACK1	7570.45	-0.998808	-5.49453	3.91759e-08	9.75493e-07
LIF	148.881	-1.80261	-5.49082	4.00078e-08	9.94658e-07
TMEM173	83.3351	1.98539	5.48199	4.20574e-08	1.04399e-06
ANKZF1	350.836	-1.21584	-5.48117	4.22533e-08	1.04723e-06
ACTA2	2353.18	1.31084	5.47839	4.29208e-08	1.06212e-06
AC005281.1	43.908	-2.5415	-5.4698	4.50543e-08	1.1132e-06
AC145207.4	287.868	-1.43048	-5.46407	4.65329e-08	1.14796e-06
RPS16	1753.57	-0.990094	-5.46137	4.72483e-08	1.16381e-06
FGD4	58.0267	2.35232	5.45938	4.77813e-08	1.17513e-06
EPHB2	184.919	1.45317	5.45784	4.81948e-08	1.18348e-06
AGTR1	49.4512	2.61443	5.44436	5.19923e-08	1.27477e-06
CDKN1C	116.831	-1.81216	-5.4398	5.33419e-08	1.30386e-06
NCAM2	225.635	1.51753	5.44004	5.32691e-08	1.30386e-06
BCL2L1	175.414	1.49284	5.43872	5.36662e-08	1.30978e-06
GPR89A	117.002	1.7237	5.4373	5.40943e-08	1.31822e-06
ME1	194.593	-1.44651	-5.43087	5.60795e-08	1.36451e-06
ACACB	120.582	1.76174	5.42664	5.74245e-08	1.39512e-06
PDP1	202.943	1.41743	5.42027	5.95076e-08	1.44353e-06
EZR	1127.59	-1.15604	-5.41655	6.07603e-08	1.47169e-06
ACAN	24788.4	-2.52327	-5.41395	6.16498e-08	1.49097e-06
KIAA1549L	203.689	-1.64858	-5.41074	6.27639e-08	1.51563e-06
SLC27A3	143.811	1.68303	5.41045	6.28661e-08	1.5158e-06
RPL14	1691.07	-0.97596	-5.40608	6.44193e-08	1.55092e-06
APOBEC3G	48.9906	2.64663	5.40259	6.56864e-08	1.57904e-06
DOK1	803.326	-1.14116	-5.39918	6.69459e-08	1.60636e-06
NFIB	121.695	1.97002	5.39897	6.70237e-08	1.60636e-06
TAPBPL	115.252	1.71323	5.39845	6.72203e-08	1.60866e-06
RPL26	2521.65	-1.13153	-5.3928	6.93694e-08	1.65761e-06
CDON	132.932	-1.59101	-5.39063	7.02118e-08	1.67523e-06
ACTA2-AS1	1232.24	1.26621	5.38973	7.05647e-08	1.68114e-06
AC007750.1	184.509	-1.62823	-5.38648	7.1849e-08	1.70919e-06
OLFML2B	493.049	1.1371	5.38418	7.27743e-08	1.72607e-06
DDIT4-AS1	5583.06	-0.936478	-5.3842	7.2767e-08	1.72607e-06
AMOTL1	2589.05	-1.10698	-5.37313	7.73804e-08	1.8326e-06
MT1E	913.74	1.19131	5.36496	8.09683e-08	1.91473e-06
CNMD	394.497	-3.36834	-5.3644	8.12172e-08	1.91778e-06
HADH	193.21	-1.39784	-5.36209	8.2265e-08	1.93966e-06
PREX1	185.775	-1.44244	-5.35256	8.67162e-08	2.0416e-06
C5orf46	120.935	1.81118	5.35144	8.72565e-08	2.0513e-06
AP005329.1	586.014	1.12833	5.3503	8.78071e-08	2.06121e-06
LONP1	993.682	-1.01658	-5.34959	8.81561e-08	2.06637e-06
COL5A2	37625.1	-1.00238	-5.3422	9.18257e-08	2.14923e-06
SMC6	396.215	1.2299	5.33198	9.71454e-08	2.27042e-06
RARB	38.178	-2.62558	-5.33008	9.81688e-08	2.29099e-06
LAMP2	1199.71	0.998436	5.32546	1.00695e-07	2.34381e-06
CTSL	1252.9	1.06853	5.32541	1.00725e-07	2.34381e-06
CGREF1	201.309	-1.78116	-5.31578	1.06199e-07	2.46758e-06
COL2A1	133623	-3.30364	-5.3114	1.08786e-07	2.52403e-06
TAPBP	593.966	1.14023	5.30798	1.10847e-07	2.56812e-06
SNORC	445.323	-3.32512	-5.30595	1.12087e-07	2.59308e-06
GABARAPL1	1076.04	1.03517	5.3055	1.12363e-07	2.59571e-06
EMP1	1705.33	0.970079	5.30457	1.12942e-07	2.60532e-06
HIF1A	2213.94	-1.1218	-5.30377	1.13433e-07	2.61289e-06
RELT	276.482	-1.25769	-5.30234	1.14329e-07	2.62972e-06
FAM180A	1057.81	-1.20542	-5.29991	1.15857e-07	2.66105e-06
TMX4	749.229	1.05403	5.29679	1.17856e-07	2.70308e-06
NLGN4X	177.062	1.45133	5.29327	1.20147e-07	2.75168e-06
TNC	53213	1.1875	5.29252	1.20641e-07	2.75904e-06
MYD88	128.176	1.60995	5.2888	1.23121e-07	2.81173e-06
CHST15	252.989	-1.43433	-5.28795	1.23697e-07	2.82085e-06
RFLNA	96.647	-1.84165	-5.28607	1.24975e-07	2.84594e-06
RPL39	1559.31	-0.987136	-5.28118	1.28354e-07	2.91873e-06
CYP4B1	30.6556	3.47519	5.27808	1.30548e-07	2.9644e-06
CA2	237.759	-1.38837	-5.27381	1.33618e-07	3.02982e-06
PSD	164.318	-1.4569	-5.27281	1.34348e-07	3.04204e-06
AKAP12	656.143	1.18775	5.26648	1.39063e-07	3.14436e-06
KCNMA1	858.55	-1.19285	-5.25923	1.44657e-07	3.26623e-06
SOX8	265.178	-2.89829	-5.25679	1.46591e-07	3.30521e-06
AKR1B10	30.283	3.45027	5.25486	1.48137e-07	3.33537e-06
MALAT1	20944	-1.23076	-5.25385	1.48953e-07	3.34902e-06
HIST1H4E	380.988	-1.13784	-5.24786	1.53874e-07	3.45482e-06
TBC1D16	1303.22	0.977068	5.24401	1.57121e-07	3.52276e-06
NCSTN	458.534	1.15807	5.24263	1.58306e-07	3.54438e-06
NPM1	4429.89	-0.909925	-5.2421	1.58758e-07	3.54952e-06
APCDD1L	982.009	-1.07758	-5.23854	1.61855e-07	3.61371e-06
OSTC	828.026	-1.19788	-5.23662	1.63545e-07	3.64635e-06
DNAJC17	229.832	1.40257	5.23163	1.68022e-07	3.74095e-06
RPL8	3935.18	-0.965122	-5.23038	1.69159e-07	3.76102e-06
PDCD1LG2	41.8165	2.72124	5.22648	1.72767e-07	3.8359e-06
HCP5	50.5128	2.39044	5.22132	1.77648e-07	3.93335e-06
TNFAIP2	213.247	1.37543	5.22134	1.77631e-07	3.93335e-06
HCG4P7	54.176	2.33229	5.22018	1.78746e-07	3.9522e-06
MEF2C-AS2	62.111	-2.10495	-5.21491	1.83907e-07	4.06069e-06
ADCY2	28.5819	-2.97683	-5.20877	1.90092e-07	4.19146e-06
KIAA1211	29.5877	-2.95661	-5.20322	1.95861e-07	4.31271e-06
HIP1R	132.771	1.5682	5.201	1.98224e-07	4.35875e-06
CORO6	199.892	1.47747	5.19684	2.02706e-07	4.44508e-06
FAM19A5	238.542	-1.28172	-5.19698	2.02555e-07	4.44508e-06
FRMD6	1167.13	-1.20124	-5.19427	2.05528e-07	4.50078e-06
TIAM2	511.382	-1.15096	-5.19297	2.06968e-07	4.52611e-06
AC022034.2	57.9417	2.16887	5.1917	2.08384e-07	4.55086e-06
KCNQ1OT1	711.667	-1.27759	-5.19033	2.09924e-07	4.57822e-06
MYLK	765.961	1.01556	5.18986	2.10449e-07	4.58342e-06
SLC17A9	305.54	-1.34289	-5.18565	2.15265e-07	4.68195e-06
PAPPA-AS1	378.167	-1.20547	-5.18146	2.20158e-07	4.78185e-06
PRR5L	185.818	-1.57744	-5.17937	2.22632e-07	4.82903e-06
LIPA	295.331	1.32414	5.17537	2.27463e-07	4.92713e-06
RNF144B	90.7434	-1.76105	-5.17035	2.33655e-07	5.0544e-06
CDK6	631.679	-1.0217	-5.16181	2.44577e-07	5.28352e-06
PNRC1	526.553	-1.13185	-5.15724	2.50611e-07	5.40658e-06
CCDC102B	44.7426	2.50804	5.14519	2.67247e-07	5.75771e-06
DIP2C	992.636	-0.976215	-5.14366	2.69433e-07	5.79699e-06
DDIT4	10058.9	-0.907285	-5.13646	2.79969e-07	6.01558e-06
SAMD4A	752.561	-1.01916	-5.13136	2.87664e-07	6.1726e-06
RPL13A	10342.1	-0.954661	-5.12928	2.90857e-07	6.23276e-06
IL16	469.485	-1.0847	-5.12511	2.97363e-07	6.36365e-06
CES1	94.5506	1.72974	5.11911	3.06976e-07	6.56058e-06
SELENBP1	306.729	1.38125	5.11722	3.10075e-07	6.61796e-06
SOCS3	514.163	-1.21349	-5.11411	3.15219e-07	6.71879e-06
GPX1	528.511	1.16089	5.11161	3.19417e-07	6.79919e-06
TGFBR2	849.135	1.04506	5.10808	3.25455e-07	6.91851e-06
KLF2	101.586	-1.95475	-5.10151	3.36956e-07	7.1535e-06
SH3RF2	36.9843	2.72228	5.09662	3.4577e-07	7.33088e-06
NRN1	358.732	-1.17111	-5.0834	3.70733e-07	7.84973e-06
RBCK1	398.95	1.19414	5.07887	3.79679e-07	8.02851e-06
GBP1P1	26.4026	4.07344	5.07813	3.81171e-07	8.04941e-06
HES4	48.5139	2.34029	5.07572	3.86037e-07	8.1414e-06
MMP3	91.5096	-1.77783	-5.0753	3.86888e-07	8.1486e-06
SGCD	311.768	-1.17719	-5.0729	3.9179e-07	8.24098e-06
ADAMTS4	738.978	-1.19769	-5.07184	3.93984e-07	8.27626e-06
DZIP1L	285.096	-1.22646	-5.07052	3.96727e-07	8.32295e-06
APCDD1	296.536	1.36578	5.06369	4.11221e-07	8.61571e-06
GYG2	75.9174	-1.83576	-5.06221	4.14417e-07	8.67129e-06
MRNIP	885.603	1.01053	5.06009	4.19066e-07	8.75711e-06
CARD6	114.689	1.59273	5.05718	4.25508e-07	8.88012e-06
AC007620.2	330.445	-1.13478	-5.05598	4.28191e-07	8.92446e-06
FAM198B-AS1	300.407	1.16886	5.05423	4.3212e-07	8.99463e-06
VLDLR	239.904	-1.42028	-5.05026	4.41218e-07	9.17206e-06
RHBDL2	97.3263	-1.85266	-5.04854	4.4519e-07	9.24261e-06
EXTL1	151.062	-1.60769	-5.04256	4.59347e-07	9.52415e-06
SETMAR	106.98	1.66525	5.04018	4.65105e-07	9.63105e-06
ABI2	958.312	-1.27334	-5.03808	4.70237e-07	9.72472e-06
ENC1	1094.27	0.956556	5.03069	4.88709e-07	1.00937e-05
SVIL	602.574	1.02284	5.02266	5.09607e-07	1.05117e-05
U62317.3	169.686	1.38683	5.01681	5.25368e-07	1.08229e-05
MFAP3L	231.807	-1.34677	-5.01291	5.36122e-07	1.10302e-05
AKR1B1	181.866	1.34117	5.00633	5.54779e-07	1.13994e-05
FAM198B	765.568	0.988475	5.00174	5.68161e-07	1.16593e-05
SPAG4	199.788	-1.31014	-5.00053	5.71716e-07	1.17172e-05
RNF112	94.2255	1.96447	4.99758	5.80555e-07	1.18832e-05
FGF11	108.555	-1.57246	-4.98537	6.18447e-07	1.26426e-05
SOAT1	321.615	1.14082	4.98413	6.22407e-07	1.27073e-05
DNM1	127.537	-1.61312	-4.9819	6.29633e-07	1.28384e-05
SAP30	769.21	0.985116	4.98113	6.32143e-07	1.28732e-05
B4GALNT3	147.664	-1.69844	-4.9801	6.35516e-07	1.29254e-05
HECW1	53.4675	2.21954	4.97882	6.39719e-07	1.29943e-05
FGFBP2	451.139	-2.76566	-4.97815	6.41963e-07	1.30234e-05
PDGFRA	2621.5	0.917099	4.97695	6.45957e-07	1.30878e-05
DDX41	783.575	-0.966249	-4.97058	6.67521e-07	1.35076e-05
SDHA	1089.38	-0.964272	-4.96658	6.81425e-07	1.37715e-05
RAB8A	336.03	1.14581	4.96386	6.91075e-07	1.39489e-05
AC009041.2	30.552	-2.64337	-4.95404	7.26898e-07	1.46535e-05
CTSO	252.769	1.21185	4.94973	7.43157e-07	1.49452e-05
MT1M	153.901	1.45713	4.94947	7.44142e-07	1.49452e-05
APCDD1L-AS1	202.241	-1.37106	-4.94947	7.44174e-07	1.49452e-05
ETS2	138.416	-1.56053	-4.94713	7.53141e-07	1.51063e-05
IFNGR1	785.054	1.02918	4.94476	7.62382e-07	1.52534e-05
WISP1	605.961	1.11367	4.94493	7.61732e-07	1.52534e-05
GAS5-AS1	172.468	-1.47207	-4.94302	7.69198e-07	1.53705e-05
ADAM22	370.278	-1.20537	-4.94225	7.72251e-07	1.54122e-05
PKD1	4139.39	-0.888669	-4.93717	7.92638e-07	1.57994e-05
RPL18	2439.81	-0.877088	-4.93676	7.94327e-07	1.58133e-05
STXBP4	183.314	1.37365	4.93537	7.99971e-07	1.59059e-05
TGFBI	36764	-0.808179	-4.93121	8.17225e-07	1.62288e-05
ADAMTS1	708.037	1.19226	4.91709	8.78411e-07	1.74222e-05
INHBE	47.0718	-2.48355	-4.9091	9.14976e-07	1.81249e-05
STAT5A	173.039	1.4995	4.90747	9.22584e-07	1.8253e-05
MTHFD1L	667.802	-1.03624	-4.90628	9.28213e-07	1.83417e-05
BATF2	22.762	3.8871	4.90556	9.31607e-07	1.8386e-05
PCK2	273.824	-1.2914	-4.90441	9.37065e-07	1.84709e-05
HIST1H2BN	106.774	-1.59376	-4.90242	9.46612e-07	1.86361e-05
RPL10	3940.23	-0.817374	-4.8986	9.65212e-07	1.89789e-05
GBP4	29.3057	3.78367	4.89391	9.88516e-07	1.94133e-05
ANKH	1540.49	-1.15188	-4.88701	1.0238e-06	2.00815e-05
ACKR3	732.754	-1.28585	-4.8866	1.02593e-06	2.00988e-05
GFPT1	917.132	-0.922314	-4.88632	1.02739e-06	2.01027e-05
PLAGL1	184.125	-1.44766	-4.88154	1.05262e-06	2.05712e-05
EIF3E	1489.57	-0.906657	-4.87643	1.08022e-06	2.10848e-05
TAP2	91.2277	1.71969	4.8749	1.08863e-06	2.12229e-05
KRAS	336.946	-1.15015	-4.87284	1.10007e-06	2.142e-05
PGK1	8122.25	-0.842465	-4.86946	1.11906e-06	2.1763e-05
TNFAIP3	114.329	1.60572	4.86728	1.13143e-06	2.1977e-05
ATP6V0E1	1013.93	0.914327	4.8657	1.14051e-06	2.21012e-05
TTC3	2265.84	-1.03829	-4.86569	1.14059e-06	2.21012e-05
KCNK2	175.083	1.31723	4.86107	1.16755e-06	2.25961e-05
ACVRL1	119.48	1.61975	4.85833	1.18379e-06	2.28827e-05
BIN1	453.676	-1.12854	-4.85787	1.18653e-06	2.2908e-05
NBAS	1005.08	-0.968318	-4.85436	1.20777e-06	2.32901e-05
PTCHD4	202.494	1.31834	4.85043	1.23192e-06	2.37272e-05
LOXL3	1475.61	-0.964715	-4.84988	1.23538e-06	2.37651e-05
FCGRT	691.055	1.11103	4.84719	1.25222e-06	2.406e-05
TULP4	458.017	-1.01524	-4.84382	1.27366e-06	2.44427e-05
MT-CO3	2257.87	-0.944673	-4.84352	1.27557e-06	2.44499e-05
GAS8	339.019	-1.07697	-4.84282	1.28012e-06	2.45078e-05
MET	192.386	1.31527	4.84186	1.2863e-06	2.45967e-05
HOOK2	503.39	-0.987698	-4.84154	1.28839e-06	2.46071e-05
HUNK	25.1685	-2.91445	-4.83484	1.3325e-06	2.54192e-05
KHDRBS3	49.6245	2.11566	4.83026	1.36352e-06	2.598e-05
IARS	1764.42	-0.975794	-4.8249	1.40073e-06	2.66572e-05
NR4A1	95.1214	-1.78566	-4.82322	1.4126e-06	2.68512e-05
CTSC	125.072	-1.52251	-4.81736	1.45468e-06	2.76182e-05
P4HA2	5308.02	-0.939326	-4.81707	1.45678e-06	2.76253e-05
JARID2	135.87	-1.54743	-4.81511	1.47116e-06	2.78648e-05
C5orf56	63.5019	2.0146	4.81274	1.48877e-06	2.8165e-05
GPAM	659.736	1.04174	4.8121	1.49351e-06	2.82213e-05
ITPR2	630.927	-0.996956	-4.80634	1.53721e-06	2.90128e-05
HOMER2	263.446	-1.21321	-4.80533	1.54494e-06	2.91243e-05
FIBCD1	26.2218	-2.85428	-4.80296	1.56336e-06	2.94368e-05
EPRS	1089.6	-1.04097	-4.80048	1.58282e-06	2.97683e-05
SLC16A3	3247.97	-0.871501	-4.79943	1.5912e-06	2.98906e-05
L1CAM	26.7131	-2.7851	-4.79878	1.59635e-06	2.99521e-05
NDST1	991.682	0.925258	4.79535	1.62393e-06	3.0434e-05
CNN2	899.498	0.897016	4.7929	1.64387e-06	3.07715e-05
CD82	255.998	1.2559	4.79113	1.65847e-06	3.10085e-05
HLA-A	15142.1	0.952245	4.78713	1.69182e-06	3.15951e-05
FAIM	158.298	1.35662	4.7846	1.71328e-06	3.19585e-05
SLC38A1	319.139	-1.26921	-4.7843	1.71586e-06	3.19693e-05
EIF2S3	1168.7	-0.930442	-4.78276	1.72902e-06	3.21771e-05
HDAC4	300.825	-1.20113	-4.77764	1.77361e-06	3.29685e-05
PXYLP1	130.131	-1.45942	-4.77706	1.77876e-06	3.30259e-05
RTN1	31.2945	2.66438	4.77609	1.78739e-06	3.31476e-05
PIK3AP1	26.4193	3.04637	4.77005	1.8418e-06	3.41171e-05
MAGED2	1744.67	-0.914837	-4.76913	1.8502e-06	3.42329e-05
AC124319.2	114.298	1.58516	4.76845	1.85646e-06	3.4309e-05
ARHGAP18	112.703	1.59612	4.76628	1.87656e-06	3.46249e-05
GFRA1	34.8501	2.46245	4.76614	1.87788e-06	3.46249e-05
GRIP2	49.1192	2.09389	4.76409	1.89711e-06	3.49393e-05
MFAP5	90.9958	1.68588	4.76072	1.92905e-06	3.54865e-05
IMPDH2	1380.47	-0.862992	-4.76036	1.93244e-06	3.55081e-05
LGMN	390.411	1.0277	4.7599	1.93694e-06	3.55498e-05
RPS27A	3560.8	-0.938668	-4.75679	1.96694e-06	3.60591e-05
CYP4F22	171.585	1.55623	4.75604	1.97423e-06	3.61513e-05
CRTAC1	125.174	-1.47049	-4.75456	1.98881e-06	3.63766e-05
MPP6	397.726	-1.01579	-4.75319	2.00237e-06	3.65827e-05
ALDH3A2	352.528	1.08575	4.74669	2.06773e-06	3.77337e-05
LRRC1	195.391	-1.28428	-4.74646	2.07012e-06	3.77343e-05
CFD	1355.05	2.28092	4.74451	2.09009e-06	3.80549e-05
SMIM10L2A	26.7036	-2.66155	-4.74029	2.13415e-06	3.88128e-05
PTPRG	1021.88	0.988994	4.73392	2.20225e-06	4.00058e-05
PITPNM3	57.7785	-1.89648	-4.73173	2.22611e-06	4.03934e-05
ADM2	73.3714	-1.75454	-4.72975	2.24801e-06	4.07445e-05
C1orf74	99.6145	-1.55269	-4.7242	2.31023e-06	4.18248e-05
GREM1	358.408	-1.29431	-4.72127	2.34375e-06	4.23838e-05
ADGRF4	24.8124	3.33041	4.71734	2.38952e-06	4.31626e-05
ECE1	371.006	1.07289	4.70371	2.55473e-06	4.60648e-05
RPL12	3960.96	-0.832926	-4.70361	2.55595e-06	4.60648e-05
BMP1	1007.82	-0.954289	-4.70159	2.58149e-06	4.64727e-05
HCG4P5	4121.41	0.923056	4.7013	2.5851e-06	4.64853e-05
GALNT8	20.9405	-3.19421	-4.70055	2.59462e-06	4.6604e-05
WNT4	52.8039	-1.98928	-4.69922	2.61152e-06	4.68549e-05
ROS1	850.303	1.01688	4.69405	2.67849e-06	4.80027e-05
LAMC1	6583.11	0.917405	4.69208	2.70435e-06	4.84118e-05
LIMA1	592.44	0.934253	4.68741	2.76678e-06	4.9474e-05
RPL21	1546.41	-0.922451	-4.68163	2.84601e-06	5.08339e-05
P2RX6	93.4733	1.83012	4.68071	2.85882e-06	5.10058e-05
MAN1A1	384.765	1.09011	4.67761	2.90244e-06	5.17262e-05
FAM171B	302.159	1.07656	4.6756	2.93097e-06	5.21764e-05
KCTD5	330.228	-1.28854	-4.67299	2.96843e-06	5.27846e-05
ISM2	53.315	-1.97024	-4.67068	3.00207e-06	5.32642e-05
SIRT2	414.541	-1.02235	-4.67084	2.99965e-06	5.32642e-05
PRKX	146.346	-1.37142	-4.66965	3.01706e-06	5.34709e-05
TMEM63C	22.737	-2.88794	-4.66694	3.05725e-06	5.41231e-05
EIF3H	1265.47	-0.891432	-4.66642	3.06495e-06	5.41994e-05
EYA1	135.591	1.51164	4.66592	3.07235e-06	5.42703e-05
GNAS-AS1	40.6466	-2.26242	-4.66225	3.12766e-06	5.51862e-05
TMCO3	1382.28	-0.895105	-4.65998	3.16245e-06	5.57387e-05
AP000757.1	20.1724	-3.32608	-4.65835	3.18756e-06	5.61193e-05
NEBL	151.525	-1.4821	-4.65295	3.27226e-06	5.75471e-05
RPL37A	4116.94	-0.881501	-4.64559	3.39111e-06	5.95717e-05
RPL24	1515.5	-0.881059	-4.64284	3.43648e-06	6.03024e-05
GRAMD1A	239.619	-1.14088	-4.64143	3.4601e-06	6.06504e-05
FGFRL1	1412.32	-0.853334	-4.63823	3.51408e-06	6.15291e-05
MAPK8IP3	666.138	-0.970362	-4.63656	3.54258e-06	6.19602e-05
EPHB3	177.199	-1.26064	-4.63208	3.62008e-06	6.32466e-05
SHISA2	49.8686	-2.00251	-4.62939	3.66753e-06	6.40056e-05
ELOVL3	61.9894	1.94764	4.62429	3.75892e-06	6.55291e-05
C2	43.0165	2.23958	4.62207	3.79926e-06	6.61601e-05
P2RY1	54.8023	-1.92412	-4.6147	3.9366e-06	6.84772e-05
ADD3	1304.07	0.851805	4.61097	4.0079e-06	6.96416e-05
RPS15A	1142.76	-0.904044	-4.60965	4.03356e-06	7.00114e-05
AR	95.6952	1.69084	4.60713	4.08273e-06	7.07879e-05
PLXNA3	777.757	-1.01368	-4.60542	4.11636e-06	7.12938e-05
ANO5	19.5015	-3.28676	-4.60506	4.12343e-06	7.13389e-05
AL445490.1	17.2416	3.57594	4.60483	4.12806e-06	7.13418e-05
CASP7	190.416	1.21125	4.60448	4.13504e-06	7.13853e-05
ADGRD1	86.0474	-1.58527	-4.60381	4.14836e-06	7.1538e-05
SERPINA1	39.3955	-2.29798	-4.60034	4.21799e-06	7.26603e-05
SIPA1L1	732.645	-0.951566	-4.60008	4.22336e-06	7.26745e-05
CXCL11	18.8748	3.53158	4.59764	4.27301e-06	7.34498e-05
RPS11	6027.54	-0.844969	-4.597	4.28625e-06	7.35983e-05
EIF2S2	743.658	-0.968535	-4.59281	4.37314e-06	7.50096e-05
SMIM3	745.343	0.905006	4.59239	4.382e-06	7.5081e-05
PLTP	812.475	0.917355	4.59214	4.38732e-06	7.50918e-05
TMEM145	14.4109	-3.51944	-4.5908	4.41558e-06	7.54946e-05
SCD5	403.16	1.00958	4.59	4.4325e-06	7.5703e-05
AC009163.1	67.3007	-1.89603	-4.58797	4.47583e-06	7.63615e-05
C1orf198	260.063	-1.18156	-4.58681	4.5008e-06	7.67055e-05
FAM102A	241.379	-1.12857	-4.58423	4.55661e-06	7.7574e-05
SLC35E1	554.855	-0.975296	-4.58347	4.57327e-06	7.77748e-05
RHOC	1498.23	-0.948471	-4.57216	4.82723e-06	8.19202e-05
TM4SF1	170.62	1.25455	4.57216	4.82727e-06	8.19202e-05
PHTF2	275.708	-1.16804	-4.57132	4.8466e-06	8.21609e-05
IPO5	786.83	-0.97388	-4.57083	4.85807e-06	8.21811e-05
UBE2Q2	783.407	-1.09674	-4.57104	4.85298e-06	8.21811e-05
DUSP10	157.349	1.37939	4.56894	4.90187e-06	8.28344e-05
AL139317.3	294.757	-1.15731	-4.56853	4.91151e-06	8.29096e-05
FMO3	26.0425	2.75271	4.56636	4.96277e-06	8.36865e-05
JADE1	505.976	1.03874	4.56519	4.99053e-06	8.4066e-05
NAV3	205.778	1.34449	4.56263	5.05156e-06	8.50045e-05
SLC25A10	88.6237	-1.59273	-4.5619	5.06923e-06	8.52121e-05
ANKRD33B	46.7367	2.1052	4.55695	5.19007e-06	8.71518e-05
CYP26B1	34.8188	-2.23542	-4.55588	5.21663e-06	8.75059e-05
SND1	2677.51	-0.791508	-4.5534	5.27845e-06	8.84501e-05
SNHG16	647.392	-0.90987	-4.55212	5.31071e-06	8.88973e-05
S100A11	371.219	0.994792	4.55104	5.33817e-06	8.92637e-05
RAB11FIP4	316.016	-2.86019	-4.55019	5.35974e-06	8.95307e-05
EFR3B	72.7699	-1.7216	-4.54692	5.44368e-06	9.08378e-05
WSB2	527.562	-0.996401	-4.54637	5.45785e-06	9.09794e-05
S100P	417.192	-2.86574	-4.54575	5.47401e-06	9.11537e-05
YBX1	2832.91	-0.859734	-4.543	5.54597e-06	9.22559e-05
AC135983.2	112.96	-1.48199	-4.54006	5.62369e-06	9.34515e-05
TNFSF11	225.926	-1.45689	-4.53838	5.66871e-06	9.41017e-05
PPFIA3	96.0048	-1.4823	-4.53664	5.71577e-06	9.47845e-05
RPL22	1171.64	-0.865772	-4.53353	5.80062e-06	9.60919e-05
C1RL	437.997	1.19979	4.53108	5.86833e-06	9.7113e-05
RPL10A	3125.89	-0.850751	-4.52808	5.95209e-06	9.83972e-05
AC007899.1	33.8664	2.3317	4.52784	5.95891e-06	9.84083e-05
MAOA	1137.34	0.838369	4.52736	5.97257e-06	9.85319e-05
EPHB6	37.6649	2.37632	4.52532	6.0305e-06	9.93852e-05
CARD16	17.4033	3.46145	4.52325	6.08979e-06	0.00010023
ARHGEF1	389.024	-1.00788	-4.52309	6.0943e-06	0.00010023
FGFR3	1009.24	-2.222	-4.52262	6.10787e-06	0.000100247
MYORG	255.935	-1.2524	-4.52264	6.10724e-06	0.000100247
RASGEF1A	52.3847	-2.04354	-4.52069	6.16387e-06	0.000101062
SLC39A10	209.604	-1.16784	-4.52041	6.17211e-06	0.000101094
RPLP2	3100.06	-0.798221	-4.51914	6.20914e-06	0.000101596
HIGD1A	197.841	1.21822	4.51541	6.31953e-06	0.000103297
LINC00475	130.879	-1.33331	-4.51422	6.35489e-06	0.000103768
TPD52L1	81.6752	-1.67252	-4.51037	6.4715e-06	0.000105565
GSDMD	304.308	1.20108	4.51008	6.48038e-06	0.000105602
CDC42SE1	885.34	-0.960282	-4.50939	6.50131e-06	0.000105816
POR	319.075	1.07555	4.50922	6.50675e-06	0.000105816
THRB	94.5798	1.54349	4.5083	6.53487e-06	0.000106165
ALDH18A1	1252.4	-0.994079	-4.50504	6.63592e-06	0.000107616
SPRN	79.028	-1.63643	-4.50499	6.63762e-06	0.000107616
PHGDH	393.08	-1.03699	-4.50249	6.71606e-06	0.000108777
NPAS2	73.5026	-1.68092	-4.49874	6.83559e-06	0.000110601
POLR3D	380.759	-1.04044	-4.49838	6.84731e-06	0.000110679
FURIN	1343.37	-0.869778	-4.49709	6.88903e-06	0.000111128
GDF5	190.309	1.34781	4.4971	6.88868e-06	0.000111128
PODNL1	242.504	1.10265	4.49606	6.9223e-06	0.000111552
KDELR3	678.407	-1.18495	-4.4955	6.94054e-06	0.000111734
AL365277.1	142.143	-1.27813	-4.49402	6.98897e-06	0.0001124
CACNB2	67.3204	1.76979	4.48984	7.12782e-06	0.000114518
DPYSL2	1411.53	0.797024	4.48925	7.14741e-06	0.000114717
SERPINH1	8753.32	-0.898508	-4.48235	7.38251e-06	0.000118372
MMP28	612.306	0.890236	4.47947	7.48286e-06	0.000119861
LITAF	276.767	-1.05572	-4.47839	7.52095e-06	0.00012035
TYRO3	977.84	-0.947516	-4.47765	7.54682e-06	0.000120643
ATF4	2748.93	-0.784126	-4.47639	7.59158e-06	0.000121238
LTBP3	504.273	1.27063	4.47375	7.68586e-06	0.000122554
LRRC8E	187.166	-1.31787	-4.47366	7.68934e-06	0.000122554
ITGA6	105.979	-1.44951	-4.47246	7.73243e-06	0.000123118
TMEM158	37.5615	2.1984	4.47208	7.74617e-06	0.000123214
KCTD12	771.157	0.941343	4.46973	7.83178e-06	0.000124452
PBXIP1	831.76	0.871315	4.46847	7.87823e-06	0.000125066
ANGPTL7	3104.77	-2.73563	-4.46766	7.9078e-06	0.000125411
SUSD4	21.7097	-2.70536	-4.46728	7.92212e-06	0.000125513
CLDN11	84.0198	1.68035	4.46257	8.09836e-06	0.000128179
AC002546.1	22.0306	2.97936	4.458	8.27282e-06	0.00013081
VSTM2L	31.6781	2.46189	4.45612	8.34567e-06	0.000131832
ANO7L1	64.4227	1.89745	4.45452	8.408e-06	0.000132685
ADAMTS18	466.167	-2.70975	-4.45359	8.44472e-06	0.000133133
CAVIN3	369.196	1.07294	4.44814	8.66157e-06	0.000136418
SEMA3A	401.56	-1.09929	-4.44789	8.67194e-06	0.000136447
RPL23A	2401.97	-0.861826	-4.44677	8.71726e-06	0.000137025
PTPRF	311.691	-1.13615	-4.44394	8.83264e-06	0.000138551
FAM162A	577.177	-0.978278	-4.44393	8.83284e-06	0.000138551
IRX3	239.172	1.09255	4.44375	8.84033e-06	0.000138551
GPD2	314.163	1.06016	4.4418	8.92114e-06	0.00013968
RPL35A	2408.26	-0.818779	-4.44128	8.94251e-06	0.000139878
LOXL1-AS1	150.287	1.25426	4.43926	9.02668e-06	0.000141056
TNFRSF14	125.687	1.56319	4.4384	9.06319e-06	0.000141213
RPL32	4747.73	-0.803372	-4.43862	9.05365e-06	0.000141213
RBP4	390.043	-2.47927	-4.4385	9.05881e-06	0.000141213
IFFO1	168.122	1.21184	4.43792	9.0833e-06	0.000141388
CXCL13	393.613	1.36306	4.43645	9.14547e-06	0.000142079
SQOR	46.7337	1.95776	4.43649	9.1438e-06	0.000142079
TFRC	596.348	-1.17837	-4.43569	9.17776e-06	0.000142442
AC004656.1	139.917	-1.35627	-4.43411	9.24529e-06	0.000143351
SCN2A	73.9139	1.64308	4.43062	9.39614e-06	0.000145549
ENPP5	69.0204	1.71328	4.42708	9.5519e-06	0.000147819
SLC25A12	170.387	1.24031	4.42674	9.56674e-06	0.00014784
A2M	1305.93	-2.54915	-4.42663	9.57179e-06	0.00014784
CYP27C1	78.5663	-1.77824	-4.42618	9.59159e-06	0.000148003
RPL29	1417	-0.783216	-4.42416	9.68188e-06	0.000149252
GPX4	867.563	0.947493	4.42184	9.78637e-06	0.000150718
SRFBP1	254.989	-1.16184	-4.42126	9.81278e-06	0.000150979
HIST1H2BD	327.651	1.0335	4.41788	9.9674e-06	0.00015321
PRSS35	72.1122	-1.62309	-4.41694	1.00107e-05	0.000153728
LIN7A	118.076	1.35611	4.40764	1.04501e-05	0.000160321
NOP53	636.82	-0.904723	-4.40459	1.05983e-05	0.000162439
CREB3L2	806.939	-0.998487	-4.3982	1.09153e-05	0.000166978
MLXIP	473.332	-1.15482	-4.3984	1.09052e-05	0.000166978
CILP	519.786	2.66802	4.39263	1.11986e-05	0.000171148
USP53	286.785	1.3652	4.39106	1.12802e-05	0.000172066
ARNT2	30.8765	2.36243	4.39116	1.12745e-05	0.000172066
C1orf216	335.151	1.04008	4.38982	1.13447e-05	0.000172885
DST	4843.97	-0.835447	-4.38893	1.13909e-05	0.000173423
AC026954.3	139.876	-1.28124	-4.38744	1.14692e-05	0.000174283
EMP3	2113.12	-0.836681	-4.38745	1.14689e-05	0.000174283
COL1A1	109861	-2.13286	-4.38613	1.15384e-05	0.00017517
RPL18A	2138.84	-0.758613	-4.38412	1.16453e-05	0.000176625
B3GLCT	192.645	1.15528	4.38341	1.16836e-05	0.000177037
TNFAIP6	297.385	1.02481	4.38065	1.18326e-05	0.000179125
CCNI	755.921	-1.03645	-4.3776	1.19991e-05	0.000181474
PITX2	192.7	1.14056	4.3725	1.22829e-05	0.00018559
GRAMD2A	52.8572	-2.0157	-4.37035	1.24049e-05	0.000187257
COL18A1	661.718	-0.903156	-4.36736	1.25758e-05	0.000189657
AC008894.2	199.051	1.16664	4.36701	1.25961e-05	0.000189784
ZFYVE26	283.455	1.02408	4.36655	1.26222e-05	0.000189998
RORA	842.857	-0.854489	-4.36449	1.27422e-05	0.000191625
LNPEP	788.655	0.920268	4.36211	1.28816e-05	0.000193539
PRDM6	48.1416	-1.86587	-4.3605	1.29765e-05	0.000194782
HLA-H	158.712	1.3865	4.35868	1.30852e-05	0.000196229
RPS13	1294.99	-0.833192	-4.35733	1.31659e-05	0.000197255
IL6ST	1759.51	0.812839	4.35509	1.33012e-05	0.000199095
VCAN	11517.9	-0.808705	-4.35426	1.33519e-05	0.000199667
AC010336.1	193.047	-1.29324	-4.35159	1.35153e-05	0.000201921
AC006030.1	241.09	-1.1761	-4.34575	1.38801e-05	0.000206984
LINC00702	15.4724	3.26609	4.34585	1.38735e-05	0.000206984
AL513217.1	33.405	2.23051	4.34296	1.40574e-05	0.000209433
APOL4	172.971	1.17721	4.34099	1.41843e-05	0.000211127
CXCL10	60.265	2.17049	4.33967	1.42698e-05	0.000212202
AC015912.1	54.7147	1.88399	4.33745	1.44147e-05	0.000214157
HSD17B11	97.6717	1.46343	4.33652	1.44758e-05	0.000214865
PATL1	185.636	1.21111	4.33295	1.47124e-05	0.000218174
SOX5	439.736	-1.06974	-4.33169	1.47967e-05	0.000219222
IL17RE	49.8241	1.95039	4.32756	1.5077e-05	0.000223167
DGLUCY	217.615	1.13586	4.32396	1.53253e-05	0.000226632
AC090568.2	34.6447	-2.09802	-4.32343	1.53625e-05	0.000226973
KCNK5	87.5314	-1.71702	-4.31589	1.58963e-05	0.000234642
GSDMB	107.709	-1.38112	-4.31543	1.59292e-05	0.000234911
TMEM200C	17.721	-3.32184	-4.31516	1.59487e-05	0.000234983
ASF1A	128.359	1.28794	4.31146	1.62179e-05	0.000238728
TLL1	62.2957	-1.81061	-4.30824	1.64562e-05	0.000242013
TGFB3	266.977	-1.10029	-4.30735	1.6522e-05	0.000242757
GFOD1	407.616	1.00516	4.30505	1.66944e-05	0.000245066
GAPDHP1	49.1917	-1.8762	-4.30146	1.69674e-05	0.000248844
RPL31	3969.12	-0.864103	-4.3006	1.70339e-05	0.000249591
SCARB1	244.078	-1.28605	-4.29102	1.77853e-05	0.000260362
AL450332.1	20.3321	-2.60239	-4.29018	1.78531e-05	0.00026091
AC068580.1	34.5795	-2.19208	-4.29015	1.78554e-05	0.00026091
NIPAL2	179.697	1.24049	4.28973	1.78889e-05	0.000261162
SEMA3C	623.603	0.896022	4.27854	1.88127e-05	0.000274397
CYP1B1-AS1	445.717	0.949768	4.27662	1.89751e-05	0.000276514
PHOSPHO1	235.307	-2.73971	-4.27565	1.90583e-05	0.000277464
QPCTL	80.0957	-1.50095	-4.27545	1.9075e-05	0.000277464
SSBP2	201.979	1.12868	4.27488	1.91243e-05	0.000277676
CDH11	4284.41	0.743184	4.27497	1.9116e-05	0.000277676
TET1	86.9039	-1.47354	-4.27393	1.92054e-05	0.000278348
SEMA7A	486.474	-1.0987	-4.27408	1.91932e-05	0.000278348
PEA15	420.013	0.973475	4.26958	1.95842e-05	0.000283581
SUN2	1117.86	0.835555	4.26488	2.00014e-05	0.00028936
HIST1H3B	54.4657	-1.75484	-4.26456	2.00298e-05	0.000289509
EGLN3	164.144	-1.46402	-4.26246	2.02193e-05	0.000291967
KSR1	115.56	-1.38643	-4.26227	2.02364e-05	0.000291967
CDH19	16.4489	-3.0147	-4.26076	2.03733e-05	0.000293677
SLC2A12	169.265	-1.15734	-4.2597	2.04701e-05	0.000294807
GALC	300.474	1.02824	4.25787	2.06379e-05	0.000296956
TRIM26	244.508	1.07778	4.25751	2.06714e-05	0.00029717
PAICS	518.473	-0.911686	-4.25697	2.07213e-05	0.000297619
ATG16L2	229.727	-1.10586	-4.25392	2.10057e-05	0.000301434
SLC4A7	404.053	-1.10128	-4.25287	2.11045e-05	0.00030258
RAC3	104.604	-1.35484	-4.24915	2.14584e-05	0.000307378
SMOC1	213.721	1.11083	4.24742	2.16251e-05	0.000309488
AGPAT5	334.891	-1.08271	-4.24574	2.17871e-05	0.000311528
CA9	547.92	-0.922081	-4.24193	2.21608e-05	0.000316589
CLEC18C	27.8089	-2.32674	-4.23935	2.24172e-05	0.000319965
ADAMTSL2	24.2136	-2.36247	-4.23712	2.26402e-05	0.000322859
ADAM17	296.022	0.991567	4.23642	2.27108e-05	0.000323578
SDC2	1398.8	-0.908846	-4.23524	2.28306e-05	0.000324995
PODN	42.1966	2.16839	4.23259	2.31011e-05	0.000328262
SLC29A1	1319.14	-0.908719	-4.23265	2.30956e-05	0.000328262
KIAA0513	290.85	1.02941	4.23137	2.32274e-05	0.000329763
MTSS1	151.172	1.3684	4.22872	2.35029e-05	0.000333378
SIDT2	586.391	-0.949846	-4.22477	2.39181e-05	0.000338967
NAPA	184.878	1.13677	4.2243	2.39683e-05	0.000339377
SMCHD1	682.913	0.818992	4.2222	2.41927e-05	0.000342252
AC015802.6	316.774	-0.996166	-4.22173	2.4244e-05	0.000342674
MKI67	26.8551	-2.39821	-4.22018	2.44111e-05	0.000344731
FKBP14	548.319	-0.895046	-4.21983	2.44484e-05	0.000344954
NTNG2	68.1913	1.64091	4.21742	2.47109e-05	0.000348043
CXCL12	36.8007	2.08059	4.2176	2.46919e-05	0.000348043
ZNF74	173.189	-1.12165	-4.21371	2.51213e-05	0.000353511
GATD1	457.563	-0.87384	-4.21237	2.52709e-05	0.000355304
NINJ1	168.545	1.17642	4.21134	2.53855e-05	0.000356602
TNFAIP8	112.669	1.31105	4.21068	2.54607e-05	0.000357344
FOXO1	952.882	0.939413	4.20858	2.56982e-05	0.00036036
LY6E-DT	20.7466	2.99012	4.20788	2.57773e-05	0.000361153
CMTR1	380.82	1.02826	4.20737	2.58358e-05	0.000361656
FKBP10	7902.18	-0.710157	-4.20586	2.60087e-05	0.000363758
SCARA5	132.662	1.24715	4.20512	2.60948e-05	0.000364642
C6orf48	835.036	-0.966347	-4.20278	2.63653e-05	0.000368101
RPS18	11652.9	-0.85074	-4.20257	2.639e-05	0.000368124
PABPC1	1405.07	-1.04004	-4.20169	2.64926e-05	0.000369233
GNPNAT1	488.795	-1.06819	-4.20037	2.66475e-05	0.000371068
TMTC2	78.3149	-1.58137	-4.19754	2.69827e-05	0.00037541
MYL3	70.4936	-1.53418	-4.18788	2.8157e-05	0.000391407
RHOD	213.198	-1.11882	-4.18683	2.82874e-05	0.000392878
AC124319.3	74.6851	1.5698	4.18431	2.86036e-05	0.000396924
CDC14A	71.3243	-1.64174	-4.18247	2.88353e-05	0.000399793
EPGN	23.0348	2.56459	4.18189	2.89096e-05	0.000400476
CNN1	46.0712	1.83807	4.17897	2.92836e-05	0.000405305
HSD11B1	554.796	0.948091	4.17522	2.97703e-05	0.000411686
NUDT16	476.955	0.89741	4.17277	3.00917e-05	0.00041577
SYT11	241.011	1.04629	4.17059	3.03813e-05	0.000419047
SLC4A3	86.3342	-1.41295	-4.17078	3.03559e-05	0.000419047
SLC1A4	224.189	-1.05675	-4.17019	3.04344e-05	0.000419418
SEC24A	497.383	-0.963961	-4.16994	3.04682e-05	0.000419522
CREB3L1	237.667	-1.22873	-4.16571	3.10388e-05	0.00042701
RPS25	931.811	-0.789542	-4.16434	3.12254e-05	0.000429209
ADGRL2	466.292	0.916235	4.15931	3.19216e-05	0.000438401
THBS2	9522.57	-0.993959	-4.15793	3.21146e-05	0.000440673
GGT5	507.754	2.14985	4.15702	3.22428e-05	0.000442053
RPL27	1471.9	-0.737976	-4.155	3.25288e-05	0.000445592
ADORA2B	57.7373	-1.71653	-4.1445	3.40555e-05	0.000466105
STMN2	188.195	1.25228	4.13483	3.55212e-05	0.00048575
RPL13	5731.63	-0.783187	-4.13409	3.56358e-05	0.000486901
RAMP1	168.597	-1.24545	-4.13033	3.62238e-05	0.000494512
VDAC2	461.183	-0.869912	-4.12357	3.73043e-05	0.000508829
RANBP3L	205.074	1.06555	4.12296	3.74029e-05	0.000509737
CASP4	181.031	1.12615	4.12216	3.7534e-05	0.000511088
SIPA1L2	44.3612	-1.80139	-4.12168	3.76112e-05	0.000511704
CDC42EP4	95.4008	1.42469	4.12126	3.76805e-05	0.000512212
GIPR	26.9391	-2.27563	-4.12014	3.78648e-05	0.00051428
ANKFY1	469.783	0.996645	4.11818	3.81874e-05	0.00051822
STON2	162.523	1.13046	4.11409	3.88704e-05	0.000527042
MATN2	1361.17	-2.0491	-4.11129	3.9345e-05	0.000533025
RPS20	2705.51	-0.753279	-4.11063	3.94588e-05	0.000533964
SYTL2	119.971	-1.41456	-4.1105	3.94812e-05	0.000533964
SRGN	696.902	0.833895	4.10819	3.98765e-05	0.000538856
CTGF	3144.38	-0.72978	-4.10627	4.02099e-05	0.000542429
SLC11A2	451.362	0.870246	4.10637	4.01926e-05	0.000542429
STK24	836.978	-0.772164	-4.10608	4.02428e-05	0.000542429
ID4	213.717	-1.08902	-4.10415	4.05809e-05	0.000546526
FNDC3B	2290.5	-0.743716	-4.10328	4.07326e-05	0.000548107
P4HA1	3204.66	-0.80458	-4.10276	4.08252e-05	0.000548891
RPS4Y1	1950.22	-0.819798	-4.09952	4.14e-05	0.000556151
MAN2B2	549.35	0.899599	4.09884	4.15233e-05	0.000557049
PSAP	9930.68	0.670743	4.09876	4.15365e-05	0.000557049
BOC	184.274	1.22104	4.09642	4.19588e-05	0.000562241
RBMXL1	106.775	1.31557	4.08525	4.40294e-05	0.000589493
RBPJL	429.612	-2.54034	-4.08465	4.41428e-05	0.000590517
LINC01614	696.897	-1.10354	-4.0836	4.43434e-05	0.000592703
SMPD1	575.551	0.976734	4.08305	4.44476e-05	0.0005936
AC009950.1	26.8285	2.32195	4.07977	4.50803e-05	0.000601547
NIM1K	72.4853	-1.51782	-4.07933	4.51657e-05	0.000602184
HLA-DRB6	25.63	2.41819	4.0789	4.52493e-05	0.000602295
KANK2	1177.98	0.763397	4.07891	4.52469e-05	0.000602295
ZC3H12C	177.324	1.09649	4.07801	4.54229e-05	0.000604102
TRIM65	217.823	-1.07145	-4.07738	4.55453e-05	0.000605227
KCNK3	30.265	2.14335	4.06791	4.74367e-05	0.000629836
C7orf49	262.445	1.10202	4.06749	4.75224e-05	0.000630357
GGA2	274.974	-0.964075	-4.06733	4.75548e-05	0.000630357
HAS2	1015.48	0.748323	4.066	4.78263e-05	0.000633431
CTSS	52.0698	1.83099	4.06419	4.81989e-05	0.000637838
MEGF8	1529.59	-0.828192	-4.06296	4.84549e-05	0.000640695
ETV7	11.8573	2.99228	4.06254	4.85414e-05	0.000641308
CSGALNACT2	380.986	-0.903322	-4.06027	4.90154e-05	0.000647036
FAM43A	131.88	1.4248	4.05782	4.95325e-05	0.00065332
FZD4	515.609	0.888576	4.05763	4.95732e-05	0.00065332
SLC31A1	442.506	-1.03166	-4.05731	4.96411e-05	0.000653676
MFSD2A	108.271	1.30258	4.05526	5.00775e-05	0.000658338
ADAMTS7	274.236	0.964337	4.05538	5.0053e-05	0.000658338
HIST1H4A	43.8942	-1.76875	-4.05442	5.02588e-05	0.000660178
GOLGA8A	208.781	-1.0929	-4.0528	5.06082e-05	0.000664223
SFRP1	290.815	1.11323	4.05095	5.101e-05	0.000668946
RAB7B	50.0537	1.76477	4.04946	5.13351e-05	0.000672658
C17orf107	119.052	-1.21739	-4.04846	5.15564e-05	0.000675004
AC096564.1	53.1942	-1.66998	-4.04765	5.1734e-05	0.000676775
P3H4	755.495	-0.933225	-4.04355	5.26478e-05	0.000687885
SNAI1	130.788	-1.27519	-4.04345	5.26693e-05	0.000687885
WWTR1	726.348	-0.852765	-4.04153	5.31046e-05	0.000693005
HAPLN1	4313.3	-2.21064	-4.04008	5.34339e-05	0.000696733
PPP1R14C	99.5197	-1.41107	-4.03927	5.36173e-05	0.000698554
MME-AS1	68.944	1.5819	4.03731	5.40679e-05	0.000703851
FAT3	1343.67	-2.43017	-4.03457	5.47019e-05	0.000711526
LENG8	760.82	-0.942601	-4.0315	5.54212e-05	0.000720295
C9orf3	422.829	-0.880588	-4.02091	5.79726e-05	0.000752844
TRIL	20.0904	2.51976	4.01788	5.87229e-05	0.000761967
UNC93B1	194.896	1.06676	4.01738	5.88482e-05	0.000762974
IRF1	82.7538	1.4331	4.01559	5.92985e-05	0.00076819
KLF6	357.185	0.941859	4.00932	6.08944e-05	0.000788225
GJB2	62.9789	-1.77147	-4.00862	6.10743e-05	0.000789914
LMAN1	2265.53	-0.778627	-4.00692	6.1515e-05	0.000794423
CERS1	31.0969	-2.03186	-4.00689	6.15223e-05	0.000794423
ENPP2	1211.77	-0.72247	-4.00627	6.16853e-05	0.000795885
CALCOCO2	671.782	0.805075	4.00281	6.2594e-05	0.000806958
CAPN2	1071.6	0.728246	4.00221	6.27548e-05	0.000807728
STARD7	903.953	0.752352	4.00229	6.27324e-05	0.000807728
ACE	27.6783	2.18875	4.00138	6.29738e-05	0.000809895
QARS	733.868	-0.781292	-3.99926	6.354e-05	0.000814662
RNF19A	569.832	0.828807	3.9995	6.34763e-05	0.000814662
AC010761.1	1484.93	-0.842141	-3.99941	6.34998e-05	0.000814662
RPL19	3686.53	-0.673314	-3.99923	6.35483e-05	0.000814662
ERF	1171.84	-0.719996	-3.99903	6.36023e-05	0.000814701
EIF2A	416.995	-0.861999	-3.9973	6.40684e-05	0.000820014
QPCT	63.5782	1.55816	3.9967	6.42329e-05	0.000821462
CSGALNACT1	390.45	-0.982238	-3.99646	6.42967e-05	0.00082162
TUB	438.051	-0.839266	-3.9952	6.46405e-05	0.000825354
CSTB	161.703	1.1097	3.99449	6.4833e-05	0.000827151
KISS1R	18.9578	-2.47428	-3.99318	6.5194e-05	0.000831093
FOXA3	9.2042	-2.89035	-3.99162	6.56245e-05	0.000835915
B3GALT1	32.3767	2.01981	3.9906	6.59076e-05	0.000838853
FAM111A	97.7065	1.32965	3.98849	6.64962e-05	0.00084567
GNS	1459.24	0.709532	3.98827	6.65565e-05	0.000845765
MAP2	76.2133	-1.53201	-3.98525	6.74093e-05	0.000855921
SCN1B	107.288	-1.33768	-3.98358	6.78861e-05	0.000861291
RAPGEF3	53.7225	1.78283	3.98333	6.79575e-05	0.000861514
DDO	20.1074	2.50631	3.98269	6.81403e-05	0.000863146
RPLP1	4155.28	-0.735981	-3.98203	6.83286e-05	0.000864846
ENPEP	86.7788	1.65579	3.98057	6.87509e-05	0.000869503
KIAA1551	125.377	1.1886	3.97989	6.89463e-05	0.000871285
ANGPT2	27.1441	2.16322	3.97876	6.92762e-05	0.000874763
ACTB	13197	0.70381	3.97722	6.97268e-05	0.000879757
AC245140.2	744.956	-0.758568	-3.976	7.00848e-05	0.000883577
MIR181A1HG	51.039	-1.69507	-3.97361	7.07911e-05	0.000891779
SCD	7833.01	-2.31194	-3.97308	7.09498e-05	0.000893074
PAPPA	2476.55	-0.746191	-3.96866	7.22786e-05	0.000909084
GBA	208.384	1.03558	3.96755	7.26158e-05	0.000911875
FLNC	1014.45	-0.727178	-3.96737	7.26716e-05	0.000911875
OR7C1	27.1016	2.15975	3.96755	7.26142e-05	0.000911875
TRIM2	598.191	0.800254	3.96712	7.27457e-05	0.000912089
NOL3	345.977	-0.873294	-3.9643	7.36108e-05	0.000922212
RASL10B	274.638	1.01221	3.96298	7.40185e-05	0.000926594
CEBPD	424.741	0.846474	3.96262	7.41323e-05	0.000927292
AL159174.1	30.861	-1.97145	-3.95783	7.56336e-05	0.000945331
TMEM123	1035.87	0.728242	3.95601	7.62106e-05	0.000951799
CSDC2	68.1048	-1.48951	-3.95446	7.6708e-05	0.000957264
ACOX2	69.1026	1.49789	3.95118	7.77659e-05	0.000969708
NES	1027.46	-0.851712	-3.94857	7.862e-05	0.000979594
PCDH18	894.056	0.770561	3.94489	7.98364e-05	0.000993976
CKAP4	2067.33	-0.996163	-3.94247	8.06479e-05	0.0010033
BMP6	36.2914	-1.96103	-3.94111	8.11042e-05	0.00100819
GAS6-AS2	31.9586	2.05812	3.93891	8.18529e-05	0.00101671
ERAP2	24.4371	2.27911	3.93629	8.27504e-05	0.00102626
ASPA	18.1068	2.99851	3.93632	8.27391e-05	0.00102626
GADD45A	233.462	1.00367	3.93417	8.34864e-05	0.00103458
FES	148.308	1.18806	3.93281	8.39578e-05	0.00103962
CREBRF	233.46	1.01386	3.93072	8.46929e-05	0.0010471
NAGLU	318.733	0.958985	3.93084	8.46504e-05	0.0010471
PNLIPRP3	10.7516	2.85603	3.92934	8.5179e-05	0.0010523
PCOLCE2	836.487	-0.794858	-3.92701	8.60086e-05	0.00106172
UNC5C	275.503	-1.0146	-3.92495	8.67488e-05	0.00107004
PDE1A	80.3347	1.38221	3.92404	8.70756e-05	0.00107324
CORIN	53.3479	1.61018	3.92182	8.7884e-05	0.00108237
AL645608.3	22.9653	-2.1859	-3.92039	8.84041e-05	0.0010871
GPC6	406.144	-0.864863	-3.9204	8.84005e-05	0.0010871
LRP3	207.458	1.01364	3.91554	9.02037e-05	0.00110838
EVI2A	39.6937	1.83279	3.91195	9.15537e-05	0.0011241
DAZAP2	634.945	0.774764	3.91111	9.18743e-05	0.00112717
DCN	19929.4	0.63156	3.91041	9.21398e-05	0.00112956
DSC2	18.8749	-2.3597	-3.90981	9.23689e-05	0.0011315
SDK2	85.1558	-2.49672	-3.90673	9.35531e-05	0.00114513
IL7R	23.7351	-2.16304	-3.90642	9.36754e-05	0.00114575
CYP26A1	16.2489	-2.6201	-3.90603	9.38242e-05	0.00114669
FNIP1	374.682	0.903021	3.9032	9.49287e-05	0.00115877
PLCXD1	116.515	-1.25258	-3.90313	9.49571e-05	0.00115877
PGM3	875.054	-0.939136	-3.90003	9.61801e-05	0.0011728
TNIK	152.336	-1.2738	-3.89888	9.66405e-05	0.00117751
STX3	72.8551	1.44461	3.89837	9.68414e-05	0.00117906
CAPN1	538.493	0.791547	3.89804	9.69736e-05	0.00117977
FMO2	23.7072	2.2422	3.89751	9.71876e-05	0.00118148
C14orf37	182.247	-1.07287	-3.89647	9.76068e-05	0.00118567
AC013451.1	95.7913	1.38232	3.89235	9.92783e-05	0.00120506
PAXIP1-AS2	54.8526	1.58022	3.88994	0.000100268	0.00121615
APLF	72.6876	-1.41672	-3.88856	0.000100839	0.00122215
GLT8D2	107.569	1.24285	3.88809	0.000101034	0.00122359
ST3GAL4	367.885	-0.876953	-3.88742	0.000101315	0.00122605
PACSIN3	294.017	-0.908429	-3.8861	0.000101868	0.00123182
WNK3	77.4423	-1.42416	-3.88378	0.000102845	0.001242
AC138028.5	79.9146	-1.36149	-3.88373	0.000102866	0.001242
FER1L6	34.3255	1.95813	3.88238	0.000103439	0.00124798
PDLIM5	1119.76	0.704158	3.8806	0.0001042	0.00125621
ISG20	110.53	1.30753	3.88017	0.000104385	0.0012575
IMPDH1	528.506	-0.887195	-3.87336	0.000107345	0.0012919
ANK1	23.0765	2.29929	3.87323	0.000107402	0.0012919
DAAM2	760.956	-0.778716	-3.87042	0.000108647	0.00130553
TMEM64	496.474	0.837043	3.87031	0.000108699	0.00130553
ADAMTS10	622.885	-0.785933	-3.87008	0.000108799	0.00130575
LAPTM4B	507.282	-0.840464	-3.86928	0.000109159	0.0013081
CEMIP	106.323	1.2707	3.8693	0.000109149	0.0013081
SKIL	1025.67	-0.797838	-3.8689	0.000109325	0.00130853
MAP2K1	394.732	-0.866524	-3.86865	0.00010944	0.00130853
C16orf45	139.957	1.15826	3.86875	0.000109394	0.00130853
DCHS1	134.739	-1.22907	-3.86806	0.000109706	0.00130878
ANKS1B	66.2658	1.57732	3.86819	0.000109647	0.00130878
THRA	575.776	0.926483	3.86806	0.000109704	0.00130878
DDX3Y	1089.43	-0.851242	-3.86594	0.000110662	0.0013192
VDR	272.552	-0.90697	-3.86474	0.000111208	0.00132471
LAMA1	39.8822	1.79415	3.85897	0.000113867	0.00135538
SPTBN2	87.036	-1.3367	-3.85817	0.000114237	0.00135845
CREBL2	237.298	0.947361	3.85789	0.000114371	0.00135845
LIPG	26.3235	-2.07837	-3.85787	0.00011438	0.00135845
F2RL2	17.0035	2.60425	3.85432	0.000116053	0.0013773
IL11RA	178.011	1.26968	3.84803	0.000119073	0.00141209
TRAM2	867.786	0.74191	3.84379	0.000121148	0.00143564
DNAJA1	958.98	0.783144	3.84208	0.000121998	0.00144464
SLC38A3	164.824	-2.4573	-3.83935	0.000123362	0.00145821
SCO2	221.066	1.05776	3.83925	0.000123412	0.00145821
POFUT2	543.29	-0.794208	-3.83924	0.000123418	0.00145821
DCBLD2	694.849	0.741763	3.83817	0.000123956	0.00146348
S100A1	1198.15	-2.07871	-3.83734	0.000124377	0.00146737
RPS21	1614.42	-0.77509	-3.83677	0.000124665	0.00146969
SLC1A5	1288.65	-0.721308	-3.83509	0.00012552	0.00147868
TLR2	18.6856	2.52366	3.83398	0.000126088	0.00148428
LSP1	1358.95	-0.744512	-3.8318	0.000127208	0.00149635
CREG1	431.013	0.811682	3.8292	0.000128561	0.00151107
GIMAP2	16.7849	2.90324	3.82903	0.000128648	0.00151107
AC092115.2	31.543	1.96979	3.8281	0.000129135	0.00151567
NR3C1	694.757	0.740129	3.82623	0.000130123	0.00152615
THSD1	67.7599	1.43367	3.82478	0.000130887	0.00153399
GALNT3	94.5582	-1.32093	-3.82412	0.000131241	0.00153702
RPL11	4574.8	-0.733106	-3.81831	0.000134368	0.00156904
ETV1	83.4619	1.38377	3.81876	0.000134126	0.00156904
SMIM10	31.7319	1.96698	3.81846	0.000134285	0.00156904
TTC3-AS1	74.52	-1.37721	-3.81844	0.000134298	0.00156904
ARMC8	335.281	0.885111	3.81784	0.000134625	0.00157088
AL645608.1	149.941	-1.0641	-3.81226	0.000137702	0.00160445
GALNT17	56.5033	1.52653	3.81229	0.000137686	0.00160445
TARS	823.641	-0.849464	-3.81116	0.000138316	0.00161043
ZPR1	470.267	-0.826421	-3.80489	0.000141866	0.00165056
R3HDML	66.282	-2.48969	-3.8018	0.000143646	0.00167006
AL391056.1	41.3081	-1.7221	-3.79748	0.000146176	0.00169823
LRRN4CL	36.9939	1.92481	3.79686	0.000146542	0.00170124
F3	168.726	1.05413	3.79555	0.000147317	0.001709
CITED4	33.4295	-1.82236	-3.79508	0.000147596	0.001711
C1QTNF8	21.713	-2.20275	-3.78867	0.000151454	0.00175445
ENTPD3	24.0202	-2.14616	-3.78623	0.000152953	0.00177053
MAGED1	949.89	-0.746303	-3.78579	0.00015322	0.00177234
ACVR2A	135.452	1.11251	3.78461	0.000153951	0.00177865
SLC29A4	39.9812	-1.70808	-3.78455	0.000153988	0.00177865
EIF4BP3	61.8576	-1.50022	-3.78365	0.000154548	0.00178383
SLC39A7	1710.32	-0.768455	-3.77958	0.000157092	0.00181188
DHCR7	155.412	-1.13734	-3.7791	0.000157396	0.00181408
TRAF1	156.918	1.05751	3.7788	0.000157588	0.00181499
VSIR	87.7628	1.29621	3.77645	0.000159081	0.00183086
AFAP1L1	139.068	1.14922	3.77548	0.000159701	0.00183537
PIEZO2	26.4219	-2.0349	-3.77548	0.000159703	0.00183537
PMP2	275.975	-2.44144	-3.775	0.000160006	0.00183754
IL13RA1	691.894	-0.841262	-3.77468	0.000160213	0.0018386
SPOCK1	1288.06	0.847288	3.77204	0.000161919	0.00185684
SYT8	42.6648	-1.83426	-3.77073	0.000162769	0.00186525
MRVI1	29.7623	1.95579	3.76893	0.000163949	0.00187743
ANXA6	2235.95	0.685857	3.76813	0.000164475	0.00188211
VCAN-AS1	805.917	-0.801339	-3.76791	0.000164618	0.00188239
FRAS1	62.4436	1.52998	3.76724	0.000165063	0.00188613
PDK3	94.9457	-1.28424	-3.76519	0.00016642	0.00190028
COL24A1	76.9156	-1.33726	-3.76409	0.000167158	0.00190734
VKORC1	392.848	-0.899258	-3.76302	0.000167873	0.00191413
AC010980.1	29.1078	1.9894	3.76073	0.000169418	0.00193037
SAV1	240.229	0.975974	3.76007	0.000169865	0.00193271
MLKL	46.7875	1.65941	3.76017	0.0001698	0.00193271
DPYSL3	2070.54	-0.766843	-3.75893	0.000170644	0.00194019
ARRDC2	330.011	0.925773	3.75847	0.000170952	0.00194232
NOTCH3	1593.1	-0.862916	-3.75672	0.000172155	0.0019546
DPYD-AS1	43.5705	1.73508	3.75648	0.000172318	0.00195505
AC009955.4	148.441	-1.17313	-3.75137	0.000175871	0.00199396
ARHGAP29	49.1021	1.66403	3.74965	0.000177083	0.00200627
IGSF3	39.7454	-1.79879	-3.74944	0.00017723	0.00200652
GPR161	239.942	0.954229	3.74638	0.000179407	0.00202973
RUNX1T1	44.7197	1.681	3.74167	0.000182801	0.00206666
BHLHE40-AS1	63.926	-1.46761	-3.73992	0.000184082	0.00207887
AK3	207.244	0.985022	3.73983	0.000184141	0.00207887
CSNK2A2	227.495	-0.923736	-3.73699	0.000186233	0.00210101
ZFAS1	323.65	-0.916551	-3.73445	0.000188129	0.00212089
CTDSPL	367.227	-0.870784	-3.73274	0.000189407	0.0021338
FAM57A	354.663	-0.862871	-3.72788	0.0001931	0.00217387
ALDH9A1	245.872	0.951213	3.72345	0.00019652	0.00221081
KIAA0040	116.978	1.16211	3.72248	0.000197273	0.00221773
TOMM20	1289.71	-0.674013	-3.71867	0.000200273	0.00224986
CARS	465.402	-0.842118	-3.71687	0.000201709	0.0022644
PKP4	246.586	-0.993874	-3.71608	0.000202337	0.00226669
COPS8	955.144	0.748519	3.71627	0.000202183	0.00226669
GNAS	2847.08	-0.709766	-3.71621	0.000202235	0.00226669
LINC01239	45.8445	-1.64015	-3.71505	0.000203167	0.00227439
PLXNB1	651.476	-0.74532	-3.71485	0.000203321	0.00227452
PRR16	74.7495	1.34003	3.71423	0.000203822	0.00227853
RUNX3	134.183	-1.1322	-3.71367	0.000204273	0.00228197
CRLF1	1022.19	0.695713	3.71181	0.000205779	0.0022972
FAM167A	110.223	1.20588	3.71134	0.000206163	0.00229988
SLC25A30	74.7329	1.44691	3.70976	0.000207455	0.00231267
LGALS9	21.7364	2.29124	3.70594	0.000210607	0.00234618
HDAC7	274.673	0.92554	3.70411	0.000212138	0.00236159
NRG1	98.2926	1.37972	3.69886	0.000216568	0.00240922
JAG1	734.718	-0.761633	-3.6951	0.000219799	0.00244347
HLA-DPB1	150.499	1.11453	3.69343	0.000221249	0.00245787
PCSK1	313.748	0.837112	3.69321	0.00022144	0.00245829
AJM1	150.666	-1.02246	-3.69096	0.000223405	0.00247839
MBNL2	635.689	0.726496	3.69062	0.000223709	0.00247915
HIF3A	62.003	1.73684	3.69053	0.000223785	0.00247915
LINC01088	15.0527	2.61227	3.6891	0.000225046	0.0024914
VEGFD	17.1851	3.23107	3.68741	0.000226545	0.00250626
STXBP5	536.804	0.749532	3.68634	0.000227506	0.00251515
LINC02202	19.6239	2.30627	3.68261	0.00023086	0.00255047
COMP	17904.3	-0.714884	-3.68089	0.00023242	0.00256593
ASPM	29.8707	-1.86707	-3.68008	0.000233162	0.00257207
INSIG2	293.367	-0.855463	-3.67993	0.000233298	0.00257207
LEF1-AS1	51.2596	-1.64741	-3.67865	0.000234467	0.00258318
AC008738.5	22.2952	2.13996	3.67721	0.000235797	0.00259604
YARS	696.833	-0.802816	-3.67447	0.000238342	0.00262226
H1F0	283.279	0.855766	3.67415	0.000238646	0.00262379
CADM3	63.7089	1.41854	3.67362	0.000239135	0.00262556
KMT5A	238.341	-0.967079	-3.67368	0.000239079	0.00262556
INPPL1	1335.53	-0.657386	-3.6733	0.000239434	0.00262703
PRDM8	55.3265	1.51355	3.67178	0.000240869	0.00264097
EIF3F	701.609	-0.706382	-3.67137	0.000241255	0.00264338
COL7A1	2542.33	-0.822778	-3.67077	0.000241824	0.00264781
GALE	123.51	-1.08583	-3.66919	0.000243322	0.00266238
STAB1	81.3475	-1.2565	-3.66876	0.000243726	0.00266316
WWC1	34.9475	-1.73767	-3.66878	0.000243713	0.00266316
CALY	12.9995	-3.135	-3.66714	0.000245282	0.00267833
FBXO42	395.192	0.832564	3.66608	0.000246293	0.00268753
MDGA1	96.5803	1.22301	3.66566	0.0002467	0.00269014
C2orf72	24.208	-2.03347	-3.66512	0.000247224	0.00269402
TMEM200A	186.7	0.960082	3.66397	0.000248333	0.00270426
GJA5	307.416	-1.03644	-3.66315	0.000249136	0.00271116
EDEM1	400.26	-0.783576	-3.66267	0.000249599	0.00271434
TRAF3IP3	35.1681	-1.77761	-3.66036	0.000251858	0.00273705
SMIM29	90.9824	1.23189	3.65854	0.000253661	0.00275477
STT3A	1699.69	-0.692867	-3.65771	0.000254478	0.00276177
NDUFA4L2	1529.25	-0.720526	-3.65731	0.000254878	0.00276423
GCA	28.6264	1.95594	3.65519	0.000256992	0.00278527
PCGF5	304.042	0.857441	3.65244	0.000259763	0.00281339
ELMO2	218.152	0.928307	3.65182	0.000260385	0.00281822
ZFYVE21	415.022	-0.883215	-3.65117	0.000261047	0.00282347
PRELP	1856.78	-0.810236	-3.65046	0.000261769	0.00282746
PHLDB2	206.267	0.929503	3.65047	0.000261763	0.00282746
MYO5C	27.6847	-1.97174	-3.64725	0.000265057	0.00286104
WNK1	2069.85	-0.764359	-3.64574	0.000266628	0.00287605
NOS3	24.7564	-2.05571	-3.64528	0.000267106	0.00287927
MEF2A	673.543	-0.713072	-3.64474	0.000267659	0.00288236
COX11	277.559	0.881344	3.64465	0.000267753	0.00288236
KDM6B	101.778	-1.4484	-3.64447	0.000267946	0.0028825
APOBEC3F	25.2882	2.03553	3.64423	0.000268191	0.00288319
CHST1	118.467	-1.15914	-3.64312	0.000269352	0.00289372
AC100778.3	52.625	-1.48158	-3.64133	0.000271236	0.00291201
C11orf96	63.5491	-1.43425	-3.64041	0.000272202	0.00292042
PHF10	190.774	-0.979672	-3.63839	0.000274344	0.00294142
NFIA	122.807	1.16472	3.63323	0.000279892	0.0029989
SATB1	244.63	-0.886205	-3.63267	0.000280507	0.00300347
FKBP11	170.483	-0.988565	-3.63207	0.000281162	0.00300847
JAK2	234.019	0.895994	3.63105	0.000282268	0.00301828
CLN8	98.7605	-1.24837	-3.63008	0.000283338	0.00302771
TLCD2	220.574	-0.923669	-3.62899	0.000284532	0.00303843
NFATC1	128.411	-1.05782	-3.62688	0.000286862	0.00305922
KLHDC7B	14.5338	2.56844	3.62694	0.000286802	0.00305922
CPNE7	53.1599	1.63362	3.62605	0.000287791	0.00306709
FAM20C	286.995	-0.833891	-3.62365	0.000290477	0.00309365
ERRFI1	390.618	-0.783389	-3.62326	0.000290918	0.00309628
CNPY3	257.798	0.932315	3.62193	0.000292412	0.00311011
RPS12	4274.29	-0.736157	-3.61956	0.000295103	0.00313665
HIF1A-AS1	139.893	-1.08992	-3.619	0.000295747	0.0031414
PLXDC1	22.4829	-2.06814	-3.61794	0.000296956	0.00315215
AP005131.6	18.2344	-2.19424	-3.61457	0.00030085	0.00319137
HPS3	168.294	0.97583	3.61409	0.000301403	0.00319401
NR2F2	57.3761	1.54748	3.61401	0.000301499	0.00319401
MDFI	1775.59	-0.644181	-3.61138	0.000304575	0.00322446
HERC3	128.776	-1.0747	-3.61113	0.000304871	0.00322546
AMMECR1L	317.917	-0.817633	-3.60898	0.000307403	0.00325009
OST4	1023.21	-0.718356	-3.60544	0.000311621	0.00329251
NT5E	758.641	0.701209	3.6045	0.00031275	0.00330226
RNF144A-AS1	34.4192	-1.71154	-3.60279	0.000314825	0.00332198
FAM107A	13.9983	2.72719	3.60031	0.000317844	0.00334941
GALNT10	1265.3	-0.718547	-3.60042	0.0003177	0.00334941
SIX4	161.276	-0.990477	-3.59911	0.000319305	0.00336259
SLC19A2	303.601	0.829904	3.59762	0.000321146	0.00337975
PLEKHA6	34.6547	1.82707	3.59641	0.000322637	0.00339321
USP54	183.58	1.00335	3.59612	0.000322994	0.00339473
SH3TC1	67.1707	-1.32675	-3.59524	0.000324094	0.00340021
GPX3	162.171	1.11085	3.59485	0.000324579	0.00340021
MIR210HG	192.417	-0.94095	-3.59488	0.000324546	0.00340021
AP002383.2	111.482	-1.15572	-3.59503	0.00032436	0.00340021
TTPAL	284.078	0.836911	3.5952	0.000324143	0.00340021
GPSM1	844.556	-0.684272	-3.59439	0.000325151	0.00340397
SNPH	114.571	1.133	3.59338	0.000326419	0.003415
PKP1	709.141	-1.92904	-3.59192	0.000328252	0.00343194
XPNPEP2	18.4552	2.23881	3.59173	0.000328493	0.00343222
AC008622.2	200.736	-0.940646	-3.5915	0.000328776	0.00343293
C5orf15	765.625	-0.772303	-3.59102	0.000329385	0.00343704
C3	387.148	2.18422	3.58896	0.000331995	0.00346201
LINC00963	258.641	0.916201	3.58474	0.00033742	0.0035163
TMOD2	74.69	1.32927	3.58019	0.000343339	0.00357565
SEMA5A	715.886	-0.764646	-3.57972	0.000343966	0.00357752
AC008738.3	31.2293	1.81525	3.57981	0.000343846	0.00357752
CMKLR1	76.4067	1.28959	3.57857	0.00034548	0.00359092
AC125257.2	91.7943	-1.30689	-3.57791	0.000346349	0.00359762
RASL12	19.5537	2.17561	3.57662	0.000348066	0.00361311
ARHGAP44	65.7704	-1.34351	-3.57621	0.000348612	0.00361643
EPC2	183.533	0.940584	3.57569	0.000349305	0.00362126
CCL2	15.54	3.10327	3.57543	0.000349659	0.00362259
ADGRA2	1135.57	0.664617	3.57495	0.000350289	0.00362676
ALDH4A1	64.0028	1.47949	3.57448	0.000350927	0.00363102
GAL3ST4	33.3431	1.79094	3.57229	0.000353868	0.00365615
ITGA5	3767.67	0.613016	3.57216	0.000354043	0.00365615
CSNK1D	869.547	-0.679573	-3.57232	0.000353831	0.00365615
ARFGAP1	1144.99	-0.720432	-3.57119	0.000355367	0.00366747
KLF4	298.626	-0.822579	-3.56721	0.000360803	0.00372116
MCL1	1749.89	0.635385	3.56383	0.000365488	0.00376705
UBA52	2819.11	-0.649477	-3.56186	0.000368233	0.0037929
PPIEL	79.5422	-1.25705	-3.5615	0.000368738	0.00379539
BIRC3	24.2606	1.98014	3.56135	0.00036895	0.00379539
S100A6	3722.96	0.705886	3.56049	0.000370156	0.00380535
COLGALT1	1440.04	-0.691673	-3.56032	0.000370398	0.00380538
COL9A1	2406.15	-1.48887	-3.55962	0.000371398	0.00381076
MCTP2	170.392	-0.952146	-3.55965	0.000371344	0.00381076
MYO1D	948.822	0.725406	3.55929	0.000371865	0.0038131
CDCP1	37.4847	1.82984	3.55821	0.000373386	0.00382625
AC008581.1	17.0316	2.26996	3.55531	0.000377538	0.00386385
EBF3	162.897	0.986754	3.55538	0.000377433	0.00386385
MAP3K5	131.571	1.04885	3.55508	0.000377864	0.0038647
AL117382.1	12.0092	-3.00417	-3.55395	0.000379487	0.00387882
AGFG2	99.8422	1.24002	3.55195	0.000382391	0.00390601
ARHGAP28	93.0269	1.17881	3.55073	0.000384167	0.00392164
EXT1	252.148	0.849525	3.55017	0.000384981	0.00392745
SLC35B2	692.837	-0.695242	-3.54843	0.000387528	0.0039509
IFFO2	288.991	-0.949899	-3.54808	0.000388053	0.00395374
MAP3K12	232.678	0.916679	3.5477	0.000388613	0.00395692
TCP11L2	163.994	-0.972616	-3.54666	0.00039014	0.00396995
P2RX4	178.598	0.936458	3.53835	0.000402629	0.00409442
TEF	145.328	1.02231	3.53709	0.000404564	0.00411148
TCF4	1009.16	-0.666196	-3.53687	0.000404904	0.00411233
RNF145	692.368	-0.746132	-3.53639	0.000405641	0.00411719
CLDN23	31.4866	1.86001	3.53618	0.000405965	0.00411787
IL17RA	139.958	1.05058	3.53582	0.000406506	0.00412074
SLC35D1	503.446	-0.777494	-3.53316	0.000410627	0.00415988
RPS2P46	26.654	-1.85562	-3.53252	0.000411626	0.00416735
PLAC9	334.249	0.878431	3.52812	0.000418515	0.00423442
PELI1	143.334	-1.05414	-3.52641	0.000421229	0.00425918
PLXNB3	105.429	-1.15835	-3.52611	0.000421714	0.00426139
MZT2B	617.673	-0.743759	-3.52227	0.000427868	0.00432084
CKB	1410.5	-1.59485	-3.52169	0.000428806	0.00432758
ATP2B1	683.17	0.690511	3.52138	0.000429315	0.00432998
IVNS1ABP	2082.9	-0.777906	-3.52059	0.000430584	0.00434005
COL10A1	22827.7	-2.27801	-3.51819	0.000434507	0.00437683
EYA4	191.706	0.929061	3.51504	0.000439682	0.00442617
SLC2A1	1535.43	-0.642489	-3.5138	0.000441744	0.00444158
AL160262.1	262.828	-1.4364	-3.51379	0.000441769	0.00444158
AP006621.4	39.3779	-1.67411	-3.51356	0.000442149	0.00444262
KIF5C	15.6507	2.30648	3.51213	0.000444533	0.00446376
HSPD1	982.236	-0.676082	-3.51154	0.000445526	0.00447092
GTF3C1	996.529	-0.702201	-3.50805	0.0004514	0.00452419
GTPBP1	727.595	0.695041	3.50807	0.00045137	0.00452419
ITGA1	312.514	0.842404	3.50739	0.000452532	0.00452985
F13A1	476.777	-1.24042	-3.50739	0.000452528	0.00452985
GFRA2	42.8016	-2.22775	-3.5069	0.000453352	0.00453239
AC079601.1	61.0098	-1.3493	-3.50692	0.000453325	0.00453239
FBLIM1	195.406	0.95097	3.50461	0.000457282	0.00456882
HLA-DMA	86.6668	1.2347	3.50352	0.00045916	0.00458472
CIRBP	1571.03	-0.678593	-3.50249	0.000460939	0.00459961
LINC02384	14.2446	2.48489	3.50194	0.00046189	0.00460622
TRIM35	230.033	0.870504	3.50176	0.000462192	0.00460636
SPATS2L	684.178	0.68063	3.50019	0.000464923	0.00463069
PGGHG	251.508	-0.971801	-3.49916	0.000466727	0.00464576
WDFY3	721.243	0.710395	3.49837	0.000468105	0.00465658
EMP2	650.234	0.713316	3.49523	0.00047366	0.00470891
CYP1B1	1103.4	0.737349	3.4934	0.000476906	0.00473823
PALD1	15.6874	-2.20005	-3.49097	0.000481263	0.00477855
RHOQ	884.173	0.665615	3.48847	0.000485797	0.00482058
ATP11C	316.981	0.806652	3.48737	0.000487795	0.0048374
XPOT	1251.41	-0.740661	-3.48516	0.000491851	0.0048746
LNCSRLR	33.7838	-1.66297	-3.4846	0.000492879	0.00488176
SPTLC3	299.491	-0.817433	-3.48345	0.000494992	0.00489965
NTN1	13.5607	2.46308	3.48312	0.000495613	0.00490276
FBLN2	845.76	0.743536	3.48101	0.000499524	0.0049384
RPL41	2685.16	-0.642163	-3.48045	0.000500577	0.00494575
CHMP1B	818.692	-0.708821	-3.47791	0.000505332	0.00498965
RGS4	17.5246	2.16785	3.47742	0.000506255	0.00499499
FAM214A	139.61	1.03508	3.4773	0.000506498	0.00499499
DSP	290.274	0.813299	3.47536	0.000510167	0.00502807
C1QTNF6	175.565	-0.960328	-3.47205	0.000516492	0.00508728
ULK1	208.338	-0.927892	-3.47055	0.0005194	0.00511276
LMF1	157.078	-0.980628	-3.46596	0.000528349	0.00519766
PTPN14	826.953	-0.800777	-3.46444	0.000531337	0.00522384
SH3BP2	324.742	-0.829866	-3.4639	0.000532409	0.00523115
TANC1	330.115	-0.804063	-3.46282	0.000534547	0.00524894
AKR1B15	13.9911	2.44742	3.46265	0.000534879	0.00524898
KDM5B	966.417	-0.683441	-3.46209	0.000535992	0.00525667
LINC00346	50.6949	1.44414	3.46128	0.000537614	0.00526934
SULF1	2078.27	-0.659887	-3.46086	0.000538458	0.00527438
AC137834.2	76.0219	-1.21119	-3.45844	0.000543308	0.00531863
FLRT2	343.163	-0.829739	-3.45785	0.000544511	0.00532714
AL596202.1	52.4337	-1.39917	-3.45754	0.000545136	0.00533
JAK3	116.918	-1.09852	-3.45714	0.000545943	0.00533462
DACT1	411.005	-1.03055	-3.45608	0.000548101	0.00534917
XBP1	706.702	-0.742132	-3.4562	0.000547845	0.00534917
ANKRD1	13.1494	2.59112	3.45384	0.000552657	0.00539035
PPM1L	65.6629	1.29411	3.45033	0.000559896	0.00545389
GNPTG	440.448	0.730077	3.4505	0.000559553	0.00545389
CAVIN1	2384.63	0.610402	3.45019	0.000560196	0.00545389
RAP1B	706.41	0.673963	3.44793	0.00056491	0.00549644
P4HB	7267.68	-0.609327	-3.44753	0.000565745	0.00550122
PROCR	218.901	0.931699	3.4459	0.00056917	0.00553116
DANCR	137.919	-1.07445	-3.44181	0.000577838	0.00561198
SLC25A28	189.009	0.946846	3.44088	0.000579824	0.00562784
MESP1	16.308	-2.11478	-3.43974	0.000582266	0.00564813
LTBP1	4715.74	-0.615281	-3.43902	0.000583829	0.00565985
AC096536.3	63.9153	1.32123	3.43851	0.000584916	0.00566695
AC103858.1	38.6992	-1.55281	-3.43799	0.00058606	0.00567459
ECM2	571.971	0.780336	3.43713	0.000587903	0.00568899
SLC48A1	63.5742	1.37478	3.43591	0.000590558	0.00571123
PLEKHG4	198.11	0.952374	3.43162	0.000599996	0.005799
EIF3A	1442.92	-0.627619	-3.42979	0.000604038	0.00583454
SERPINF1	3876.3	0.5761	3.42895	0.000605923	0.0058492
LCNL1	36.7608	1.67633	3.42631	0.000611849	0.00590284
HERPUD1	434.034	-0.776485	-3.42321	0.000618863	0.00596692
CAPN6	319.553	-2.17722	-3.42259	0.000620276	0.00597694
KLF5	54.6123	-1.39247	-3.4223	0.00062094	0.00597973
PLA2R1	301.347	0.790106	3.42058	0.000624868	0.00601393
RUNX1	831.246	-0.846113	-3.42033	0.000625455	0.00601596
ARL10	240.806	-1.02034	-3.4186	0.000629446	0.00604741
AFDN	273.743	-0.86511	-3.41842	0.000629859	0.00604741
CHD9	1217.16	-0.626157	-3.41857	0.000629517	0.00604741
LSS	523.666	0.701075	3.41787	0.000631133	0.006056
USP33	370.807	0.767751	3.41221	0.000644383	0.0061779
SNHG15	167.422	-0.930568	-3.41211	0.00064461	0.0061779
PKD2	562.574	0.691873	3.41151	0.000646045	0.00618794
CBR3	47.1427	1.46067	3.40406	0.000663927	0.00635541
SRF	346.442	0.775368	3.40373	0.000664727	0.00635926
SNHG8	326.759	-0.790174	-3.40258	0.000667519	0.00638215
BCAT1	1937.9	-0.718921	-3.39981	0.000674324	0.00643912
SOCS1	23.9659	1.87168	3.39966	0.000674686	0.00643912
HLF	12.5863	2.56234	3.39984	0.000674259	0.00643912
SNORA47	39.4927	1.73736	3.39798	0.000678854	0.00647503
SOD3	26.6241	1.85478	3.39756	0.000679906	0.0064812
LPCAT1	293.833	-0.83882	-3.39581	0.000684267	0.00651585
NACA	3499.26	-0.647647	-3.39577	0.000684356	0.00651585
ITGA7	131.629	1.03922	3.39418	0.000688347	0.00654995
CANX	4533.08	-0.568219	-3.39344	0.000690212	0.00656379
TSPAN18	198.736	-1.08866	-3.39231	0.000693054	0.00658689
AC067930.6	802.657	-0.677856	-3.39157	0.000694931	0.00659689
NR4A3	22.6896	-1.85527	-3.39171	0.000694585	0.00659689
GDF10	10.5636	-2.55128	-3.38995	0.000699059	0.00663214
PLEKHO1	216.086	0.85479	3.3886	0.000702502	0.00666026
PPP1R15A	223.22	0.857524	3.38846	0.000702856	0.00666026
SLC22A17	583.421	-0.712311	-3.38746	0.000705421	0.00668061
ZBTB47	568.224	0.7404	3.386	0.000709183	0.00671202
BAALC	161.361	0.926371	3.3858	0.000709704	0.00671202
LINC00205	424.981	-0.723043	-3.38569	0.000709998	0.00671202
PLCL1	22.9507	1.8926	3.38473	0.000712485	0.00672758
ZNF397	152.297	0.944935	3.38475	0.000712427	0.00672758
CD164	1760.56	0.598982	3.37985	0.000725245	0.00684402
ACACA	415.087	-0.781423	-3.3757	0.000736281	0.00694407
AZIN1	892.249	-0.662643	-3.37501	0.000738143	0.00695752
LGR4	203.67	-0.855284	-3.37277	0.000744158	0.00701008
SHANK1	21.7353	-1.98776	-3.3726	0.000744634	0.00701043
LGR6	32.3194	-1.77033	-3.37171	0.000747034	0.00702889
SCGB1D2	13.8932	2.84927	3.37153	0.000747531	0.00702943
ARRDC4	277.139	-0.929499	-3.36967	0.000752594	0.00706872
HAS1	1592.96	-0.644791	-3.36976	0.000752343	0.00706872
FLCN	171.642	0.92692	3.3684	0.000756055	0.00709706
PTGIR	14.3106	2.30801	3.36594	0.000762821	0.00715638
NRXN2	153.308	0.961374	3.36404	0.000768108	0.00719752
A2M-AS1	25.441	-1.77537	-3.36414	0.00076784	0.00719752
SLC2A13	395.913	-0.784564	-3.36288	0.000771333	0.00722351
CLEC18A	15.8355	-2.08127	-3.36089	0.000776929	0.00727165
ORC3	136.6	0.997299	3.35698	0.000787999	0.00737095
ANGPTL6	87.4189	1.18143	3.3557	0.000791633	0.00740061
EGFR	367.454	0.869834	3.35544	0.000792381	0.00740327
AC241644.3	124.355	-1.17989	-3.35313	0.000799045	0.00745682
CLVS1	108.469	1.05567	3.35315	0.000798986	0.00745682
JMY	251.163	-0.799189	-3.35254	0.000800736	0.00746825
PGM1	1445.07	-0.633681	-3.35211	0.000801982	0.0074755
MAPRE3	85.296	-1.18728	-3.34904	0.000810921	0.00755442
ABI3	10.268	-2.7602	-3.34855	0.000812343	0.00756326
ASTN2	80.4935	1.20653	3.3438	0.00082638	0.00768947
EEF1AKMT3	104.823	-1.08115	-3.34114	0.000834359	0.0077592
FBL	298.965	-0.781932	-3.34091	0.000835032	0.00776094
PLXND1	1143.18	0.7476	3.33747	0.000845462	0.00785331
ATOH8	74.0131	1.32129	3.33216	0.000861751	0.00799997
LIAS	213.854	-0.83386	-3.33198	0.000862316	0.00800057
TBC1D8B	179.114	-0.983509	-3.3298	0.000869092	0.00805876
C3orf38	136.098	0.983978	3.32833	0.000873691	0.00809651
TSPAN4	476.571	0.765162	3.32817	0.000874176	0.00809651
MIR137HG	30.0346	1.68142	3.32783	0.00087526	0.00810186
ABCA2	619.389	-0.696138	-3.32758	0.000876031	0.0081043
ADAM33	24.3657	1.86493	3.32301	0.000890511	0.00823349
AC135050.7	593.03	-0.704105	-3.32252	0.000892085	0.00824328
IDO1	12.5918	2.82749	3.32223	0.000893005	0.00824701
OR7A5	12.5179	2.35507	3.32192	0.000894019	0.00825161
ITM2C	667.378	-0.693912	-3.31764	0.000907817	0.00837413
VEZF1	320.651	0.751899	3.31701	0.000909849	0.00838803
RPL38	2062.21	-0.637193	-3.31581	0.000913771	0.00841933
AC097534.2	82.0966	1.19578	3.3155	0.000914798	0.00842394
TARBP1	227.781	-0.863547	-3.31439	0.000918418	0.00844955
ZMYND8	326.094	0.83022	3.31433	0.000918636	0.00844955
BTG3	125.162	-1.01634	-3.31378	0.000920444	0.00846131
BCL2L11	61.762	1.29985	3.31205	0.00092615	0.00850887
PEAR1	36.0817	1.61519	3.31065	0.000930782	0.00854161
MACROD2	26.6817	-1.73783	-3.31069	0.000930648	0.00854161
TK2	452.725	0.690342	3.31004	0.000932836	0.00855555
FRMPD4	108.781	-1.03421	-3.30698	0.000943064	0.00864439
ZNF106	739.251	0.694269	3.30639	0.000945074	0.00865785
TCEAL4	582.819	0.742852	3.30615	0.000945869	0.00866017
MAP4K4	2190.45	0.56703	3.30575	0.00094724	0.00866281
ATXN7L1	71.0053	1.43896	3.30588	0.000946793	0.00866281
FIBIN	448.462	-0.784471	-3.30264	0.000957778	0.00875417
MEF2D	364.94	-0.883727	-3.30146	0.000961838	0.00878625
AC098864.1	28.9368	-1.68956	-3.30053	0.00096503	0.00881038
CDK2AP1	773.382	-0.702036	-3.29842	0.000972312	0.00887179
TOMM7	1206.03	-0.724233	-3.29448	0.000986057	0.00899207
ATRAID	1082.34	0.627838	3.29426	0.000986809	0.0089938
GCAT	102.382	-1.09516	-3.29232	0.000993651	0.009051
EEF1D	2877.59	-0.629024	-3.29145	0.00099671	0.00907369
BLZF1	124.542	1.0039	3.28923	0.0010046	0.00914033
ROBO1	518.192	-0.672843	-3.28855	0.00100704	0.00915733
PIP4P2	66.5719	1.23802	3.2869	0.00101296	0.00920387
CCND2-AS1	90.8423	-1.09513	-3.2868	0.00101331	0.00920387
FADS1	335.251	-0.849949	-3.28594	0.00101643	0.0092269
KDM1A	648.454	-0.661895	-3.28524	0.00101896	0.00924466
PLAUR	297.818	-0.767028	-3.28341	0.00102561	0.0092997
HCLS1	62.272	-1.2799	-3.2819	0.00103111	0.00934168
TPST1	935.286	-0.631591	-3.28182	0.00103141	0.00934168
GPR39	31.2825	1.62383	3.28048	0.00103629	0.00938062
HK1	2039.44	-0.615376	-3.28029	0.00103701	0.00938178
ZFHX4	737.824	0.85009	3.27712	0.00104873	0.00948246
HIST2H2BE	181.155	0.883264	3.27687	0.00104965	0.00948542
IQSEC1	336.23	-0.87255	-3.27077	0.00107256	0.00968693
FNDC3A	858.864	0.62243	3.26913	0.00107877	0.00973277
AC005261.1	328.275	-0.740652	-3.26911	0.00107885	0.00973277
NEAT1	12515.1	-1.52294	-3.26838	0.00108166	0.00975259
AC010980.2	18.4492	1.97942	3.26711	0.00108651	0.00979085
HACD1	100.692	1.14815	3.26654	0.00108872	0.00980525
STK26	254.455	-1.84169	-3.265	0.00109464	0.00984747
TNFRSF19	610.679	0.652976	3.26512	0.00109417	0.00984747
IQGAP3	31.7451	-1.57984	-3.26445	0.00109678	0.00986116
LRRFIP1	505.822	-0.737814	-3.26214	0.00110576	0.00993627
PRSS50	11.2185	-2.25658	-3.26191	0.00110666	0.00993881
CNP	978.347	0.619584	3.2616	0.00110786	0.00994402
LDLRAD3	266.321	0.768368	3.26095	0.00111039	0.00996114
DGKH	179.078	-0.923534	-3.25963	0.00111558	0.010002
PLSCR4	152.008	1.02292	3.25402	0.00113786	0.0101961
FAM171A1	178.414	-0.874877	-3.25161	0.00114752	0.0102769
HIST1H2BL	40.6411	-1.44004	-3.24944	0.00115633	0.01035
CLEC3A	5146.17	-1.70337	-3.24796	0.00116237	0.0103982
NOS2	176.809	-2.00786	-3.24657	0.00116805	0.0104432
AK4	543.726	-0.723725	-3.24304	0.0011826	0.0105674
SLC39A11	223.14	0.830315	3.24242	0.00118518	0.0105845
UQCRH	765.651	-0.70611	-3.24164	0.00118842	0.0106076
APLN	248.843	0.838135	3.24127	0.00118999	0.0106156
LPCAT2	104.587	-1.08903	-3.24046	0.00119335	0.0106365
NUMBL	236.136	-0.896423	-3.24039	0.00119366	0.0106365
SDCBP	505.069	0.672096	3.23987	0.00119583	0.0106498
FXR1	666.252	-0.633552	-3.23916	0.00119884	0.0106707
SLC39A13	926.209	-0.658992	-3.23659	0.00120968	0.0107613
ME3	54.7993	1.35858	3.23568	0.00121353	0.0107895
NTN4	121.243	1.04156	3.23503	0.0012163	0.0108081
AC068580.4	274.567	-1.79608	-3.23486	0.00121703	0.0108086
ALDH1L2	1015.18	-0.623058	-3.23089	0.00123406	0.0109538
PYCARD-AS1	32.1787	1.59981	3.23032	0.00123651	0.0109694
MARS	924.827	-0.665809	-3.22899	0.00124229	0.0110145
RPL37	3771.32	-0.601634	-3.22802	0.00124652	0.0110398
EIF3D	885.383	-0.60816	-3.22813	0.00124604	0.0110398
FAM192A	437.959	0.710479	3.2248	0.00126061	0.0111585
ADD1	1103.66	0.586365	3.22282	0.00126936	0.0112297
CCDC50	305.113	0.7387	3.2226	0.00127033	0.011232
AC107021.1	41.322	-1.46675	-3.22095	0.00127766	0.0112906
MEIS1	175.366	0.877605	3.21928	0.00128515	0.0113333
MCUB	296.403	-0.836496	-3.2194	0.00128458	0.0113333
TMEM100	224.727	0.811028	3.21927	0.00128516	0.0113333
AL356652.1	103.305	1.05794	3.21924	0.00128533	0.0113333
LRIG1	210.106	-0.804866	-3.21858	0.00128827	0.0113529
LRP1-AS	453.926	-0.870182	-3.21798	0.00129099	0.0113707
CENPF	56.2236	-1.25457	-3.21641	0.00129807	0.0114204
PTDSS1	420.744	-0.703992	-3.2165	0.00129765	0.0114204
AL157786.1	13.329	2.20381	3.21526	0.00130328	0.01146
PSPH	91.4477	-1.08222	-3.21496	0.00130464	0.0114657
BAIAP2L1	79.1132	-1.11706	-3.2147	0.00130579	0.0114694
ESPNP	15.9665	-1.98711	-3.21374	0.0013102	0.0115018
RPS7	987.09	-0.667377	-3.21347	0.00131142	0.0115063
MAST2	389.423	-0.730785	-3.21203	0.00131802	0.0115481
PVR	248.651	-0.798876	-3.21188	0.0013187	0.0115481
BCL2L13	385.569	0.696844	3.21179	0.00131908	0.0115481
HSPA13	390.989	-0.745417	-3.21199	0.00131819	0.0115481
SBNO2	595.211	-0.718138	-3.2112	0.00132184	0.0115659
AMZ1	30.8123	-1.57097	-3.21071	0.0013241	0.0115793
COG6	302.876	-0.829014	-3.21027	0.00132608	0.0115903
DVL1	920.15	-0.606328	-3.20942	0.00133004	0.0116122
ABCD1	142.933	0.927663	3.20956	0.00132936	0.0116122
OSCAR	30.7726	-1.61461	-3.20834	0.00133503	0.0116495
ASAP3	481.477	0.692901	3.20679	0.00134225	0.0116997
EIF4H	1978.56	-0.624669	-3.2068	0.00134218	0.0116997
XPNPEP1	698.249	-0.65096	-3.20643	0.00134392	0.0117078
DACT3	42.262	-1.43957	-3.20572	0.00134724	0.0117303
LINC02242	11.5507	2.68907	3.20547	0.00134844	0.0117345
GUCY1B1	30.3867	1.66273	3.20494	0.00135089	0.0117441
SDC4	888.594	-0.739978	-3.20492	0.00135102	0.0117441
NPY2R	12.0866	2.66159	3.203	0.00136004	0.0118161
RAB29	154.86	0.899399	3.20061	0.00137137	0.011908
SFXN1	321.74	-0.719255	-3.20042	0.00137228	0.0119095
TLR4	50.4309	1.38812	3.20019	0.00137339	0.0119126
CCDC69	230.476	0.834183	3.19841	0.00138187	0.0119797
TOP2A	69.228	-1.42987	-3.19805	0.00138359	0.0119881
ARHGEF10L	207.949	0.860686	3.19787	0.00138446	0.0119892
TMEM127	394.002	0.697453	3.1951	0.00139782	0.0120983
INSC	487.655	-0.841737	-3.19258	0.00141006	0.0121976
PDK1	373.163	-0.74422	-3.19155	0.00141511	0.0122347
FMNL2	922.115	-0.662652	-3.18773	0.00143395	0.0123908
VAV2	207.474	-0.812437	-3.18584	0.00144335	0.0124654
GRSF1	731.599	-0.617785	-3.1838	0.00145354	0.0125466
NEK6	601.184	-0.647457	-3.17825	0.00148169	0.0127827
CCDC3	33.3566	-1.50792	-3.17696	0.00148826	0.0128255
FGF7	926.507	0.598223	3.17705	0.0014878	0.0128255
ADRA1B	11.9055	2.25336	3.1759	0.00149373	0.0128657
TMEM229B	46.6448	1.95234	3.17485	0.00149912	0.0129052
SYT12	27.2148	1.66489	3.17381	0.00150451	0.0129446
SNX33	592.372	0.674975	3.17324	0.00150749	0.0129633
RASSF7	60.4848	-1.21172	-3.17222	0.00151276	0.0130012
MAX	413.972	0.68437	3.17208	0.00151352	0.0130012
ENTPD7	165.351	-0.989809	-3.16997	0.00152455	0.0130889
AZI2	440.074	0.662265	3.16804	0.0015347	0.0131689
2019-09-03	14.6891	2.04465	3.1676	0.00153703	0.0131819
AC009902.2	261.494	-1.75144	-3.16635	0.00154365	0.0132315
FAM114A1	1480.78	-0.654988	-3.16274	0.00156289	0.0133867
ZCCHC7	193.22	-0.847176	-3.16264	0.00156343	0.0133867
DDIT3	189.1	0.942717	3.16146	0.00156982	0.0134342
GRINA	729.236	0.665913	3.16041	0.00157549	0.0134706
NCBP3	354.216	-0.712466	-3.16036	0.00157575	0.0134706
SDE2	231.927	-0.848292	-3.15986	0.00157844	0.0134864
MYO5B	17.9349	-1.85451	-3.15737	0.00159199	0.0135949
FAM89A	59.5585	-1.23351	-3.1555	0.00160222	0.0136676
AC023796.2	169.168	-0.869509	-3.15557	0.00160187	0.0136676
HAX1	308.408	-0.766709	-3.15446	0.00160797	0.013702
OPTN	637.239	0.643508	3.15461	0.00160713	0.013702
PSEN2	62.0431	1.20707	3.15204	0.00162133	0.0138051
PARP3	199.092	0.831903	3.1518	0.00162266	0.0138051
BEAN1	22.2651	-1.73144	-3.15192	0.00162203	0.0138051
SAMD11	267.319	-0.803373	-3.15084	0.00162803	0.0138435
KCNH2	67.1147	-2.03542	-3.14977	0.00163401	0.0138869
SLC44A2	2322.02	-0.555682	-3.14949	0.00163555	0.0138926
CD40	56.9637	1.31833	3.14873	0.00163983	0.0139216
HMOX2	312.783	0.732172	3.14794	0.00164424	0.0139516
GMCL1	121.209	-0.958367	-3.1462	0.00165406	0.0140275
ABCA1	3440.51	0.524841	3.14481	0.00166195	0.0140869
NECTIN4	38.3196	-1.42826	-3.14367	0.00166845	0.0141345
ZNF85	61.2896	-1.25458	-3.14254	0.00167491	0.0141818
B4GAT1	124.899	0.930869	3.14	0.00168948	0.0142975
RXRA	936.621	0.611694	3.13597	0.00171289	0.014488
PAPSS1	1834.85	-0.620474	-3.13505	0.00171827	0.0145258
AL358334.3	105.261	-1.03007	-3.13452	0.00172135	0.0145442
BORCS7	46.6856	1.33254	3.13272	0.00173194	0.0146259
SEC61A1	3520.45	-0.56828	-3.13094	0.00174245	0.0147069
SYNC	211.506	0.844212	3.13064	0.00174427	0.0147144
WASHC4	580.764	0.632916	3.12972	0.00174972	0.0147527
WBP1L	793.856	0.60399	3.12886	0.00175488	0.0147884
CDIPT	703.135	0.602939	3.12867	0.00175597	0.0147898
RASD2	38.7258	-1.53398	-3.12536	0.00177591	0.0149498
LIPC	15.0515	2.02977	3.12307	0.00178973	0.0150582
GXYLT2	479.386	-0.750346	-3.1229	0.00179081	0.0150594
SYAP1	391.509	-0.698062	-3.12246	0.00179348	0.0150739
P4HA2-AS1	268.134	-0.851578	-3.12106	0.00180203	0.0151378
MZT2A	197.024	-0.801782	-3.11999	0.00180856	0.0151847
CPB1	13.2677	2.13547	3.11856	0.00181739	0.0152508
BST1	17.2061	1.94703	3.11839	0.00181841	0.0152514
VAT1	662.442	0.655689	3.11774	0.00182243	0.015277
TMEM45A	835.544	-0.64702	-3.11669	0.00182894	0.0153236
ABLIM3	344.655	0.737918	3.11607	0.00183279	0.0153478
TBC1D22A	298.619	-0.719812	-3.11495	0.00183978	0.0153983
SLIT3	259.613	0.971012	3.11449	0.00184266	0.0154143
GSN-AS1	780.604	-0.588815	-3.11231	0.00185629	0.0155202
S1PR1	123.707	0.983909	3.11169	0.00186021	0.0155286
PTPN22	17.4881	1.89582	3.11171	0.00186007	0.0155286
ANXA4	441.044	0.686874	3.11192	0.00185873	0.0155286
FAM46B	20.8688	1.80705	3.11093	0.00186496	0.0155602
VCL	1160.19	0.574482	3.10948	0.00187418	0.0156289
ST3GAL1	543.612	-0.675252	-3.10774	0.00188527	0.0157132
DOCK6	103.186	-1.11672	-3.10614	0.00189548	0.0157901
RAB35	371.252	0.685242	3.10587	0.00189719	0.0157961
AKNA	179.36	0.819526	3.10479	0.00190415	0.0158458
AL590867.2	34.0861	-1.45419	-3.10195	0.00192253	0.0159904
SH3D19	1236.14	-0.576954	-3.10038	0.00193272	0.0160668
GPR180	268.412	-0.736116	-3.09972	0.00193706	0.0160945
AC068587.4	57.1895	-1.20325	-3.09927	0.00194	0.0161105
DPY19L3	239.022	-0.831174	-3.09768	0.00195045	0.0161889
CDS2	424.414	-0.662879	-3.09745	0.00195191	0.0161927
GPR1	66.6091	1.20837	3.09679	0.00195626	0.0161951
AAMDC	104.2	1.00025	3.09696	0.00195516	0.0161951
SRPRA	466.798	-0.702229	-3.09711	0.0019542	0.0161951
GDF5OS	96.0423	1.10448	3.09685	0.00195586	0.0161951
PRKCE	85.8811	1.06036	3.09572	0.00196334	0.0162453
CDR1	861.123	-0.685208	-3.09471	0.00197009	0.0162927
NMRAL2P	13.6058	2.05879	3.09379	0.00197616	0.0163344
SP140L	106.621	0.968729	3.09261	0.00198407	0.0163914
EPB41L4A-AS1	183.433	-0.809082	-3.09177	0.00198967	0.0164207
KLHL15	100.245	-0.978449	-3.09188	0.00198896	0.0164207
SSR3	1654.75	-0.620177	-3.09135	0.00199251	0.0164356
ARHGAP24	123.357	0.940907	3.08915	0.00200731	0.0165492
RENBP	27.7151	1.66643	3.08839	0.00201245	0.016583
DAB2	368.661	0.690148	3.0878	0.00201642	0.0166071
PLEKHA2	364.687	0.677452	3.08636	0.00202626	0.0166796
INTS10	363.281	-0.689645	-3.08554	0.00203184	0.0167165
RARG	418.388	-0.691929	-3.08539	0.00203283	0.0167165
UBE4B	236.2	-0.756208	-3.08513	0.00203466	0.0167229
CLEC11A	1386.16	-0.587034	-3.08476	0.00203716	0.0167348
DENND4C	275.823	0.719982	3.08392	0.00204291	0.0167735
AC003101.3	10.4133	-2.12846	-3.08371	0.00204439	0.016777
AKT1	1439.98	-0.560707	-3.08337	0.00204672	0.0167875
USH1C	22.6084	-1.70668	-3.08105	0.00206272	0.0168927
ALDH3B1	204.817	0.804848	3.08113	0.0020622	0.0168927
ATXN2L	230.983	-0.811357	-3.0813	0.00206102	0.0168927
ARHGEF39	252.599	-0.749406	-3.0804	0.00206722	0.016921
AL161729.1	26.8336	-1.60007	-3.07903	0.00207676	0.0169903
PPIC	1123.7	-0.626592	-3.07884	0.00207806	0.0169923
DDR2	3047.26	-0.529576	-3.0786	0.00207978	0.0169977
SLC44A1	1831.59	0.534006	3.07567	0.00210032	0.0171567
VPS18	311.431	0.699567	3.07528	0.00210305	0.0171702
MEFV	28.2432	1.58109	3.07394	0.00211255	0.017239
CPE	1804.36	0.533538	3.07295	0.00211955	0.0172873
AL139260.1	44.1066	-1.35376	-3.07198	0.00212641	0.0173344
AL354740.1	178.892	-0.824753	-3.07113	0.00213249	0.0173751
INTS7	90.9451	1.05881	3.0687	0.00214993	0.0175083
PPP1R14B	492.871	-0.679733	-3.06848	0.00215151	0.0175123
SLC3A2	1479.36	-0.620212	-3.06788	0.00215581	0.0175383
CYB561D1	125.694	0.922388	3.06754	0.00215831	0.0175413
INPP4B	189.907	-0.797457	-3.06753	0.00215837	0.0175413
PTK2	550.954	-0.623991	-3.06704	0.00216188	0.0175609
DPCD	246.63	-0.811674	-3.06645	0.00216615	0.0175812
KIF21A	142.693	-0.914123	-3.06639	0.00216658	0.0175812
PTPRN	190.343	-0.870916	-3.06606	0.00216897	0.0175916
TCFL5	197.59	-0.794029	-3.06451	0.00218024	0.0176708
AC000093.1	30.3249	-1.49981	-3.06442	0.00218094	0.0176708
MYCBP2	892.815	0.605767	3.06352	0.00218748	0.0177059
AC060766.1	10.5024	2.28579	3.06354	0.00218736	0.0177059
BNIP3	1367.85	-0.583654	-3.06307	0.00219075	0.0177234
NTNG1	23.6078	1.66642	3.06107	0.00220547	0.0178278
DEPP1	475.415	0.67662	3.06101	0.0022059	0.0178278
PGD	593.601	0.626073	3.05951	0.00221696	0.0179082
RNF115	349.275	0.674166	3.05929	0.00221859	0.017911
AMPH	83.446	-1.19849	-3.05917	0.00221954	0.017911
HHIPL1	738.941	-0.708511	-3.05888	0.0022217	0.0179193
SPOCD1	78.8099	1.11343	3.05867	0.00222321	0.0179224
ITGB5	3650.8	0.592056	3.05841	0.00222514	0.017929
CD300C	12.5133	-2.05995	-3.05563	0.0022459	0.0180872
P3H1	1485.88	-0.558005	-3.05495	0.00225095	0.0181187
MMP1	8.29905	-2.4488	-3.05372	0.0022602	0.018184
FAM219A	231.407	-0.753928	-3.05149	0.00227709	0.0183107
TIMP1	3884.81	0.51853	3.05035	0.00228578	0.0183713
CBR3-AS1	39.5948	1.37652	3.05006	0.00228799	0.0183798
KCNJ12	23.4687	-1.63341	-3.04887	0.00229706	0.0184434
TACC1	499.326	0.629486	3.04808	0.00230311	0.0184827
RNF207	84.8114	-1.04403	-3.04676	0.00231325	0.0185547
AC105020.1	17.8349	-1.7777	-3.04605	0.00231871	0.0185893
KCNK1	98.24	-1.03958	-3.04491	0.00232754	0.0186462
AC009133.1	1111.08	-0.553489	-3.04481	0.00232829	0.0186462
NKILA	41.3097	-1.33171	-3.04468	0.00232931	0.0186462
ACOT7	149.796	0.874641	3.04443	0.00233121	0.0186488
SERPING1	592.544	1.57924	3.04433	0.00233198	0.0186488
[truncated: 54,853 more rows]
